# Supplementary material for: Ethylene emitted by viral pathogen-infected pepper (Capsicum annuum L.) plants is a volatile chemical cue that attracts aphid vectors
Source: Front Plant Sci. 2022 Sep 29;13:994314. doi: 10.3389/fpls.2022.994314 (PMC9559363; doi:10.3389/fpls.2022.994314)
Supplement: Supplementary Table 3 — DEGs in response to infection with CMV-GTN. [file Table_3.xlsx]

## Sheet: DEGs
	Normalization						Log2FoldChange	Annotation_PGP DB v1.55, Phytozome v9.1
Gene ID	Healthy_1	Healthy_2	Healthy_3	CMV_1	CMV_2	CMV_3	CMV_vs_Healthy	E-value	Identity	PGP DB v1.55 gene ID	Gene description	Arabidopsis homolog
CA.PGAv.1.6.scaffold631.48	16.2948	15.2266	15.1158	347.201	599.733	628.459	5.07809	0	100	CA11g18780	Ripening-related protein grip22	NA
CA.PGAv.1.6.scaffold674.24	10.1843	7.10576	9.71727	187.539	158.655	158.176	4.22306	0	100	CA10g17730	Cysteine-rich receptor-like protein kinase 25	AT4G05200.1
CA.PGAv.1.6.scaffold1405.6	137.488	154.297	178.15	1952.26	3130.74	2741.02	4.05738				Glycine-rich protein	NA
CA.PGAv.1.6.scaffold291.8	18.3317	25.3777	20.5142	215.416	282.423	277.074	3.59286	0	100	CA02g05780	AP2/ERF domain-containing transcription factor	AT5G13330.1
CA.PGAv.1.6.scaffold889.4	49.903	40.6043	41.0285	489.967	562.354	488.33	3.55001	0	100	CA01g23520	tRNA/rRNA methyltransferase family protei	AT4G15520.1
CA.PGAv.1.6.scaffold939.24	158.875	215.203	199.744	2074.76	1366.43	2181.56	3.2926				Chitinase family protein (PR-3)	AT2G43600.1
CA.PGAv.1.6.scaffold575.23	16.2948	15.2266	7.55788	103.907	127.921	130.575	3.21312	0	99.9	CA12g22650	Fatty acid hydroxylase superfamily	AT1G02190.2
CA.PGAv.1.6.scaffold890.65	38.7003	48.7252	49.666	389.439	309.004	375.801	2.97011	1e-157	83.92		Chitinase family protein (PR-3)	AT3G12500.1
CA.PGAv.1.6.scaffold21.10	30.5528	29.4381	46.4269	282.998	221.785	316.353	2.94788	0	95.16	CA07g20800	Alkaline alpha-galactosidase seed imbibition protein	AT1G55740.1
CA.PGAv.1.6.scaffold588.80	99.8059	119.783	140.361	856.597	865.543	871.562	2.84915	0	100	CA08g19310	Basic-region leucine zipper transcription factor	AT2G16770.1
CA.PGAv.1.6.scaffold1306.1	167.022	131.964	125.245	896.301	941.133	1091.31	2.78736	1e-134	100	CA00g57680	Chitinase family protein (PR-3)	AT3G12500.1
CA.PGAv.1.6.scaffold1110.29	17.3133	33.4986	20.5142	166.42	194.373	119.959	2.75279	0	99.36	CA10g00300	G-type lectin S-receptor-like serine/threonine-protein kinase	AT4G27290.1
CA.PGAv.1.6.scaffold1134.16	61.1057	47.7101	55.0645	321.858	314.819	372.617	2.62263	0	100	CA08g11660	Protein of unknown function	NA
CA.PGAv.1.6.scaffold13678.1	937.972	966.383	925.3	6209.91	5436.64	5524.49	2.60128	1e-134	100	CA00g99000	Chitinase family protein (PR-3)	AT3G12500.1
CA.PGAv.1.6.scaffold889.10	10.1843	30.4533	19.4345	160.506	80.5736	113.59	2.56171	0	100	CA01g23570	Pyruvate orthophosphate dikinase	AT4G15530.6
CA.PGAv.1.6.scaffold370.26	26.4791	25.3777	29.1518	136.853	147.857	176.223	2.50841	0	99.19	CA02g14650	Responsive to dehydration 21B-like	AT5G43060.1
CA.PGAv.1.6.scaffold423.30	228.128	194.901	180.309	1069.48	1236.02	1100.86	2.49719	0	100	CA06g17700	n-methyltransferase 1-like	AT3G18000.1
CA.PGAv.1.6.scaffold254.2	33.6081	40.6043	45.3473	188.384	262.487	210.194	2.46706	0	100	CA11g10820	SWEET sucrose efflux transporter family protein	AT5G23660.1
CA.PGAv.1.6.scaffold1611.1	50.9214	79.1785	64.7818	343.822	294.883	436.312	2.46369	4e-115	95.7	CA07g09480	Chitinase family protein (PR-3)	AT3G12500.1
CA.PGAv.1.6.scaffold241.41	23.4238	28.423	16.1954	116.578	142.042	113.59	2.45161	0	100	CA06g03930	MYB transcription factor 59-like	AT5G59780.3
CA.PGAv.1.6.scaffold387.5	22.4054	32.4835	28.0721	149.524	160.317	142.253	2.44612	0	100	CA05g05140	LRR protein kinase family protein	AT3G42880.1
CA.PGAv.1.6.scaffold129.43	44.8108	62.9367	47.5066	266.947	254.181	283.443	2.37359	0	100	CA01g26360	PRLI-interacting factor	AT5G19900.1
CA.PGAv.1.6.scaffold1716.3	145.635	139.07	127.404	690.177	727.654	687.908	2.35323	0	100	CA00g80990	Protein of unknown function	AT2G42670.2
CA.PGAv.1.6.scaffold464.22	162.948	138.055	148.998	762.828	738.453	787.697	2.3467	0	82.85		Cytochrome P450	AT3G14690.1
CA.PGAv.1.6.scaffold1268.8	183.317	185.765	177.07	792.395	854.745	990.46	2.27185	0	100	CA05g15360	Ferritin 2-like	AT3G11050.1
CA.PGAv.1.6.scaffold1306.2	1704.85	1795.73	1677.85	8170.62	7342.17	9467.22	2.27019	1e-134	100	CA00g99000	Chitinase family protein (PR-3)	AT3G12500.1
CA.PGAv.1.6.scaffold23.1	21.387	26.3928	25.9127	121.647	109.647	121.021	2.25727	0	100	CA02g03060	NAC domain containing protein 36-like	AT2G17040.1
CA.PGAv.1.6.scaffold1306.3	2862.8	2938.74	2690.6	12903.9	12009.6	14334.6	2.20842	1e-134	100	CA00g99000	Chitinase family protein (PR-3)	AT3G12500.1
CA.PGAv.1.6.scaffold551.8	37.6818	55.831	56.1442	201.9	197.696	242.042	2.1001	0	100	CA09g18710	Glycine-rich cell wall structural protein	AT4G30460.1
CA.PGAv.1.6.scaffold1058.13	29.5344	43.6497	24.833	87.0113	196.865	135.883	2.09846	0	100	CA01g05210	phosphatidylinositol transfer family protein	AT4G36490.1
CA.PGAv.1.6.scaffold1306.4	8633.21	9547.1	9115.88	37486.7	34885.9	44087.7	2.09307	3e-118	97.57	CA00g99000	Protein of unknown function
CA.PGAv.1.6.scaffold540.3	91.6585	84.254	79.8975	343.822	323.125	400.218	2.06064	0	100	CA06g10190	PREDICTED: auxin-induced protein 10A5
CA.PGAv.1.6.scaffold640.26	33.6081	44.6648	17.2751	143.611	91.3721	158.176	2.04082	2e-143	100	CA07g12690	Anti-bacterial protein
CA.PGAv.1.6.scaffold546.23	22.4054	37.559	38.8691	136.853	116.292	150.745	2.03089	0	100	CA11g18070	Serine carboxypeptidase III
CA.PGAv.1.6.scaffold1572.1	154.801	159.372	173.831	603.166	597.241	753.726	2.00156	0	100	CA03g06950	Ripening regulated protein-like
CA.PGAv.1.6.scaffold5.28	174.151	214.188	186.787	713.831	735.13	833.345	1.98854	4e-39	96
CA.PGAv.1.6.scaffold407.36	63.1425	44.6648	53.9848	171.488	227.6	226.118	1.95019	0	100	CA03g32360	Hop-interacting protein THI116
CA.PGAv.1.6.scaffold1869.3	38.7003	42.6346	32.3909	146.99	165.3	126.329	1.94741	0	100	CA00g85840	Detected protein of unknown function
CA.PGAv.1.6.scaffold484.68	75.3637	57.8612	49.666	239.07	239.229	226.118	1.94545	0	99.58	CA12g21170	PREDICTED: cell wall / vacuolar inhibitor of fructosidase 1-like
CA.PGAv.1.6.scaffold1143.38	299.418	283.215	281.801	1142.13	1098.96	1046.72	1.9273	0	100	CA03g36120	Jasmonoyl-L-isoleucine hydrolase 1
CA.PGAv.1.6.scaffold388.29	218.962	210.127	222.417	763.672	804.075	867.316	1.90211	8e-149	95.61
CA.PGAv.1.6.scaffold74.8	38.7003	22.3324	37.7894	172.333	76.4203	118.898	1.89543	0	94.59	CA05g08040	PREDICTED: MLP-like protein 34-like
CA.PGAv.1.6.scaffold1156.11	39.7187	32.4835	33.4706	117.423	129.582	145.437	1.89288	0	100	CA12g00420	Metal ion binding protein
CA.PGAv.1.6.scaffold497.89	25.4607	34.5137	21.5939	81.098	126.26	93.4196	1.88261	0	100	CA02g27200	FERONIA receptor-like kinase
CA.PGAv.1.6.scaffold1435.12	41.7555	32.4835	39.9488	119.957	157.825	138.006	1.86444	0	100	CA03g06770	Aspartic proteinase oryzasin-1, putative
CA.PGAv.1.6.scaffold492.4	168.041	168.508	153.317	588.805	530.789	653.937	1.85617	0	100	CA10g01410	AT4g26860/F10M23_200
CA.PGAv.1.6.scaffold528.5	93.6953	98.4655	71.26	379.302	239.229	334.4	1.855	0	100	CA10g08470	PREDICTED: non-specific lipid-transfer protein 2-like isoform 1
CA.PGAv.1.6.scaffold35.9	59.0688	70.0425	45.3473	216.261	199.357	200.64	1.82065	1e-134	100	CA07g09480	PREDICTED: endochitinase-like
CA.PGAv.1.6.scaffold311.88	46.8477	36.5439	73.4194	175.712	183.575	193.209	1.81694	0	100	CA04g22430	Alpha-amylase
CA.PGAv.1.6.scaffold668.18	38.7003	28.423	26.9924	103.907	116.292	110.405	1.81259	0	100	CA03g08120	CXE carboxylesterase
CA.PGAv.1.6.scaffold528.6	114.064	107.602	127.404	407.179	337.246	479.837	1.81033	0	100	CA10g08490	PREDICTED: non-specific lipid-transfer protein 2-like
CA.PGAv.1.6.scaffold1164.17	96.7506	101.511	115.528	346.356	357.182	394.91	1.8076	0	100	CA02g15960	TSJT1-like protein
CA.PGAv.1.6.scaffold516.5	28.516	43.6497	42.1082	129.25	150.349	116.774	1.79436	5e-47	81.44
CA.PGAv.1.6.scaffold464.32	32.5897	43.6497	32.3909	124.181	134.566	117.836	1.79354	0	87.62
CA.PGAv.1.6.scaffold765.29	73.3268	92.3749	76.6585	301.583	218.462	317.414	1.78887	2e-54	51.83
CA.PGAv.1.6.scaffold1218.1	75.3637	70.0425	82.0569	203.59	309.835	271.766	1.78741	0	100	CA01g13030	Unknown protein
CA.PGAv.1.6.scaffold1046.7	37.6818	28.423	50.7457	149.524	117.953	135.883	1.7874	3e-36	92.38	CA03g24300	Unknown protein
CA.PGAv.1.6.scaffold749.15	971.58	936.945	1003.04	3331.77	3068.44	3646.55	1.78687	0	100	CA03g06510	GDP-mannose 3',5'-epimerase
CA.PGAv.1.6.scaffold702.22	140.543	144.145	130.643	486.588	462.675	467.098	1.76985	0	99.03	CA02g11240	PREDICTED: fruit bromelain-like
CA.PGAv.1.6.scaffold36.8	23.4238	37.559	35.63	114.044	100.509	113.59	1.76404	0	100	CA08g02480	PREDICTED: toll-interacting protein-like
CA.PGAv.1.6.scaffold27.14	73.3268	92.3749	57.2239	266.947	289.068	199.578	1.76105	0	100	CA11g05750	Peptide transporter PTR1
CA.PGAv.1.6.scaffold1989.9	52.9582	47.7101	46.4269	106.441	191.881	199.578	1.75911	7e-153	100	CA00g89120	Unknown protein
CA.PGAv.1.6.scaffold79.81	60.0872	50.7554	63.7021	233.157	143.703	211.256	1.7525	0	100	CA02g04270	Phospholipase A1
CA.PGAv.1.6.scaffold523.50	58.0504	58.8763	70.1803	234.846	194.373	200.64	1.75117	0	100	CA08g15920	ABCG1
CA.PGAv.1.6.scaffold941.13	59.0688	46.695	33.4706	138.542	192.712	136.945	1.74961	0	100	CA06g01640	Hcr2-0A
CA.PGAv.1.6.scaffold1030.38	240.349	222.309	237.533	739.174	769.187	795.128	1.718	0	100	CA04g18300	WRKY1
CA.PGAv.1.6.scaffold786.17	294.326	317.729	278.562	961.349	887.14	1053.09	1.70396	0	100	CA05g03370	Detected protein of confused Function
CA.PGAv.1.6.scaffold1932.6	46.8477	56.8461	56.1442	169.799	160.317	187.901	1.69639	0	100	CA00g87730	Unknown protein
CA.PGAv.1.6.scaffold160.42	36.6634	41.6195	36.7097	129.25	97.1867	139.068	1.66835	1e-98	90.71	CA07g01760	Eukaryotic translation initiation factor iso4G
CA.PGAv.1.6.scaffold567.84	689.476	776.558	705.042	2127.98	2374.01	2291.96	1.64584	0	100	CA01g00350	Oligopeptide transporter, putative
CA.PGAv.1.6.scaffold1320.13	425.703	410.104	462.11	1268.85	1229.37	1539.3	1.63727	3e-103	83.33
CA.PGAv.1.6.scaffold26.40	244.423	283.215	225.657	702.004	849.761	772.835	1.6257	0	99.65	CA12g14030	PREDICTED: actin-7-like
CA.PGAv.1.6.scaffold825.22	135.451	150.236	152.237	426.609	442.74	481.96	1.6256	8e-163	100	CA06g16000	PREDICTED: 60S ribosomal protein L18a-like protein-like
CA.PGAv.1.6.scaffold1613.7	36.6634	39.5892	29.1518	110.665	117.122	95.5427	1.61707	0	98.72	CA00g75340	CYP71AT2v1
CA.PGAv.1.6.scaffold170.121	1056.11	1070.94	1014.91	3192.39	2996.18	3442.72	1.61606	0	100	CA01g19950	PREDICTED: zinc finger A20 and AN1 domain-containing stress-associated protein 8-like isoform 1
CA.PGAv.1.6.scaffold1721.3	92.6769	77.1483	90.6945	244.983	276.608	268.581	1.60078	0	100	CA12g15070	Detected protein of unknown function
CA.PGAv.1.6.scaffold1001.8	43.7924	46.695	42.1082	143.611	125.429	132.698	1.59922	0	100	CA06g23610	Detected protein of unknown function
CA.PGAv.1.6.scaffold413.27	32.5897	46.695	49.666	113.199	137.058	140.129	1.59808	0	100	CA10g04090	Eukaryotic translation initiation factor 3 subunit, putative
CA.PGAv.1.6.scaffold1280.4	61.1057	51.7705	58.3036	134.318	201.019	181.531	1.59428	3e-151	100	CA06g00480	Unknown protein
CA.PGAv.1.6.scaffold371.71	30.5528	38.5741	45.3473	126.716	110.477	107.22	1.58912	0	100	CA04g19430	Serpin-like protein (Fragment)
CA.PGAv.1.6.scaffold397.73	40.7371	42.6346	51.8254	113.199	153.671	139.068	1.5862	0	100	CA09g00290	PREDICTED: 1-aminocyclopropane-1-carboxylate oxidase homolog 1
CA.PGAv.1.6.scaffold917.3	61.1057	69.0274	64.7818	164.73	221.785	198.517	1.58567	0	84.39
CA.PGAv.1.6.scaffold1091.6	65.1794	68.0123	61.5427	174.023	215.14	194.27	1.58306	0	100	CA00g44710	Anionic peroxidase swpa8
CA.PGAv.1.6.scaffold206.201	214.888	179.674	201.903	581.202	627.145	576.441	1.58124	1e-120	100	CA02g27710	PREDICTED: EID1-like F-box protein 2-like
CA.PGAv.1.6.scaffold222.110	36.6634	51.7705	33.4706	101.372	121.276	141.191	1.57755	6e-128	100	CA12g01800	PREDICTED: auxin-induced protein 15A-like
CA.PGAv.1.6.scaffold992.9	597.817	629.367	612.188	1803.58	1677.92	2007.46	1.57732	0	100	CA00g36740	Putative glutathione S-transferase T3
CA.PGAv.1.6.scaffold121.3	155.819	166.478	141.44	497.57	380.44	492.576	1.56341	0	100	CA12g11530	PREDICTED: probable ADP-ribosylation factor GTPase-activating protein AGD13-like
CA.PGAv.1.6.scaffold1830.3	130.359	125.873	128.484	311.72	477.627	335.461	1.54781	5e-41	64.44
CA.PGAv.1.6.scaffold893.5	53.9767	66.9972	42.1082	141.077	174.438	159.238	1.54158	4e-161	100	CA04g05830	PREDICTED: auxin-induced protein X10A-like
CA.PGAv.1.6.scaffold837.22	35.645	38.5741	45.3473	77.7189	141.211	128.452	1.53871	0	100	CA03g30020	Basic beta-1,3-glucanase
CA.PGAv.1.6.scaffold901.2	90.6401	94.4051	97.1727	238.225	281.592	297.244	1.53364	0	100	CA11g13250	DnaK-type molecular chaperone hsp70-rice
CA.PGAv.1.6.scaffold206.175	961.396	936.945	885.351	2512.35	2671.39	2874.78	1.53351	0	100	CA02g28010	Detected protein of unknown function
CA.PGAv.1.6.scaffold1054.25	73.3268	97.4504	100.412	203.59	318.141	262.212	1.53145	0	100	CA04g18080	SBT1 protein
CA.PGAv.1.6.scaffold58.34	45.8292	48.7252	33.4706	118.268	112.969	138.006	1.52815	0	99.63	CA11g04780	Putative sterol desaturase
CA.PGAv.1.6.scaffold170.9	43.7924	38.5741	26.9924	114.889	98.848	100.851	1.52439	3e-127	100	CA01g18900	Indole-3-acetic acid-induced protein 9
CA.PGAv.1.6.scaffold1903.2	219.98	253.777	251.569	679.195	703.565	698.524	1.52077	0	100	CA00g86920	Amine oxidase
CA.PGAv.1.6.scaffold575.22	407.371	361.379	394.089	996.829	1138	1196.41	1.51841	0	100	CA12g22660	2,4-dienoyl-CoA reductase, putative
CA.PGAv.1.6.scaffold322.130	244.423	180.689	214.86	561.772	580.628	686.846	1.51517	0	100	CA08g18550	At3g18870
CA.PGAv.1.6.scaffold375.72	81.4742	69.0274	92.8539	217.951	222.616	245.226	1.49471	8e-154	100	CA07g16490	PREDICTED: 60S ribosomal protein L18a-like protein-like isoform X2
CA.PGAv.1.6.scaffold1054.8	30.5528	55.831	44.2676	122.492	115.461	128.452	1.48772	0	100	CA04g18240	CYP81B2v2
CA.PGAv.1.6.scaffold1076.5	267.846	283.215	262.366	611.614	849.761	819.544	1.48753	0	100	CA08g12850	Nicotianamine synthase
CA.PGAv.1.6.scaffold62.7	1439.04	1459.73	1491.06	4117.41	3848.43	4294.12	1.48172	0	100	CA06g12690	PREDICTED: non-specific lipid-transfer protein 2-like
CA.PGAv.1.6.scaffold1131.35	43.7924	46.695	37.7894	103.907	119.614	133.76	1.4778	0	100	CA03g21780	Nucleic acid binding protein, putative
CA.PGAv.1.6.scaffold100.70	1241.46	1227.27	1257.85	3333.46	3112.47	3814.28	1.46114	0	99.57	CA01g23340	Unknown protein
CA.PGAv.1.6.scaffold472.53	1413.58	1361.26	1311.83	3482.14	4178.2	3548.88	1.45569	0	100	CA03g25330	Pectate lyase
CA.PGAv.1.6.scaffold941.6	81.4742	62.9367	72.3397	178.247	202.68	213.379	1.45517	0	100	CA06g01560	Calmodulin binding protein, putative
CA.PGAv.1.6.scaffold135.28	409.408	378.636	390.85	1115.94	1004.26	1108.3	1.45343	0	100	CA12g05380	PREDICTED: acetylglutamate kinase, chloroplastic-like isoform X1
CA.PGAv.1.6.scaffold529.26	897.235	951.157	943.655	2481.09	2343.28	2814.26	1.45199	6e-118	100	CA02g15240	PREDICTED: auxin-repressed 12.5 kDa protein-like isoform X1
CA.PGAv.1.6.scaffold524.25	440.979	439.542	456.712	1164.94	1211.93	1249.49	1.43927	0	100	CA03g04230	PREDICTED: pathogenesis-related protein STH-2-like
CA.PGAv.1.6.scaffold694.40	79.4374	79.1785	68.0209	214.572	184.406	214.44	1.43649	0	100	CA05g20260	Protein phosphatase 2a, regulatory subunit, putative
CA.PGAv.1.6.scaffold914.2	66.1978	89.3296	91.7742	211.193	235.076	218.687	1.42699	0	100	CA04g11700	AT14A, putative
CA.PGAv.1.6.scaffold424.66	51.9398	35.5288	31.3112	101.372	121.276	95.5427	1.4216	0	99.86	CA02g17300	Serine/threonine-protein kinase
CA.PGAv.1.6.scaffold1980.2	127.303	100.496	115.528	239.07	348.875	326.969	1.41405	0	100	CA00g88920	Receptor protein kinase CLAVATA1, putative
CA.PGAv.1.6.scaffold998.5	151.746	141.1	152.237	391.973	369.642	418.265	1.40649	0	100	CA01g09140	AT4g19390/T5K18_170
CA.PGAv.1.6.scaffold1195.4	40.7371	52.7856	39.9488	100.528	142.042	105.097	1.38117	0	100	CA10g11340	PREDICTED: LRR receptor-like serine/threonine-protein kinase GSO2-like
CA.PGAv.1.6.scaffold575.24	187.391	223.324	201.903	494.191	563.185	529.731	1.37334	0	68.75
CA.PGAv.1.6.scaffold27.21	116.101	98.4655	118.767	274.55	258.334	330.153	1.37246	2e-154	90.69	CA11g05810	PREDICTED: thioredoxin H2-like
CA.PGAv.1.6.scaffold423.31	51.9398	52.7856	64.7818	134.318	143.703	159.238	1.36714	0	100	CA06g17690	PREDICTED: probable ADP-ribosylation factor GTPase-activating protein AGD13-like
CA.PGAv.1.6.scaffold264.1	48.8845	43.6497	53.9848	162.196	100.509	114.651	1.36484	4e-176	100	CA04g13730	PREDICTED: abscisic stress-ripening protein 2-like
CA.PGAv.1.6.scaffold1307.3	1420.71	1481.04	1440.32	3442.44	3753.73	3986.26	1.36478	0	100	CA09g06120	PREDICTED: 18.1 kDa class I heat shock protein-like
CA.PGAv.1.6.scaffold993.16	105.916	115.722	105.81	318.478	261.657	257.965	1.35585	0	100	CA06g19880	Receptor-like protein kinase
CA.PGAv.1.6.scaffold1469.6	136.469	125.873	124.165	321.858	314.819	351.385	1.3541	0	100	CA00g67540	Vesicle-associated membrane protein, putative
CA.PGAv.1.6.scaffold481.50	49.903	45.6799	44.2676	110.665	108.816	138.006	1.35401	1e-65	87.04
CA.PGAv.1.6.scaffold193.37	42.774	38.5741	53.9848	102.217	117.122	125.267	1.34844	0	100	CA04g15600	Protein phosphatase 2c, putative
CA.PGAv.1.6.scaffold1241.3	89.6216	55.831	60.463	164.73	215.14	144.376	1.34819	0	100	CA09g16770	Detected protein of unknown function
CA.PGAv.1.6.scaffold947.20	77.4005	87.2993	111.209	266.103	211.817	223.995	1.34711	0	100	CA12g18930	Ankyrin repeat family protein
CA.PGAv.1.6.scaffold134.184	70.2715	76.1331	76.6585	196.831	160.317	209.132	1.34406	3e-164	100	CA08g10920	PREDICTED: uncharacterized N-acetyltransferase p20-like
CA.PGAv.1.6.scaffold643.15	1110.09	1045.56	1067.82	2793.66	2938.03	2416.17	1.33781	0	100	CA06g11330	Aldehyde dehydrogenase
CA.PGAv.1.6.scaffold1002.15	48.8845	68.0123	47.5066	130.095	152.01	130.575	1.32778	0	68.27
CA.PGAv.1.6.scaffold350.38	193.501	215.203	195.425	503.483	503.377	502.13	1.32065	0	100	CA09g03700	PREDICTED: L-ascorbate peroxidase 2, cytosolic-like
CA.PGAv.1.6.scaffold140.3	271.92	258.853	229.975	617.527	649.573	632.705	1.32036	0	100	CA01g11390	Peroxidase
CA.PGAv.1.6.scaffold311.12	90.6401	123.843	103.651	241.604	269.963	281.32	1.31748	0	100	CA04g21600	Cytokinin riboside 5'-monophosphate phosphoribohydrolase
CA.PGAv.1.6.scaffold40.12	54.9951	38.5741	30.2315	82.7875	101.34	124.206	1.31647	3e-99	96.76	CA10g16060	Leucine-rich repeat receptor protein kinase EXS
CA.PGAv.1.6.scaffold82.23	609.02	617.186	624.065	1556.91	1407.13	1643.34	1.31621	3e-146	100	CA04g06430	PREDICTED: probable non-specific lipid-transfer protein AKCS9-like
CA.PGAv.1.6.scaffold1212.17	54.9951	58.8763	51.8254	128.405	151.179	131.637	1.31137	0	100	CA04g04930	PREDICTED: probable LRR receptor-like serine/threonine-protein kinase At3g47570-like
CA.PGAv.1.6.scaffold1139.8	91.6585	88.3144	77.7381	204.434	212.648	221.871	1.30996	0	100	CA12g17070	PREDICTED: UDP-D-xylose:L-fucose alpha-1,3-D-xylosyltransferase 1-like isoform X1
CA.PGAv.1.6.scaffold234.14	124.248	130.949	120.926	253.431	327.278	351.385	1.30927	6e-169	100	CA04g00750	PREDICTED: signaling mucin HKR1-like
CA.PGAv.1.6.scaffold208.25	561.154	552.219	533.37	1251.1	1334.86	1481.97	1.30468	0	96.47	CA12g18140	Catalase
CA.PGAv.1.6.scaffold394.56	5979.19	6032.79	6267.64	13884.6	14269.8	16455.6	1.28714	8e-24	85.19
CA.PGAv.1.6.scaffold739.12	1196.65	1313.55	1316.15	2865.46	2928.06	3414.06	1.26685	6e-28	79.69
CA.PGAv.1.6.scaffold322.47	44.8108	42.6346	55.0645	116.578	95.5254	129.513	1.26132	0	95.06	CA08g17760	Methylketone synthase Ib
CA.PGAv.1.6.scaffold1459.22	1439.04	1440.44	1452.19	3028.5	3610.86	3734.66	1.25998	0	100	CA00g67030	Unknown protein
CA.PGAv.1.6.scaffold532.112	1691.61	1717.56	1708.08	4092.91	4075.2	4087.11	1.25995	5e-38	71.81
CA.PGAv.1.6.scaffold798.9	69.2531	52.7856	48.5863	131.784	155.333	119.959	1.25447	0	98.09	CA08g14550	PREDICTED: probable receptor-like protein kinase At1g11050-like isoform X1
CA.PGAv.1.6.scaffold472.12	3694.86	3335.65	3497.14	7908.74	8348.09	8785.69	1.2502	3e-156	100	CA03g24850	PREDICTED: indole-3-acetic acid-induced protein ARG2-like
CA.PGAv.1.6.scaffold358.65	1432.93	1333.85	1411.16	3356.27	3260.32	3305.78	1.24789	0	100	CA02g22380	PREDICTED: putative glucose-6-phosphate 1-epimerase-like
CA.PGAv.1.6.scaffold143.47	3556.35	3536.64	3719.55	7824.26	8667.06	9022.42	1.23857	0	100	CA12g07660	DnaJ homolog
CA.PGAv.1.6.scaffold1126.1	76.3821	73.0878	73.4194	178.247	159.486	187.901	1.23773	1e-108	74.76
CA.PGAv.1.6.scaffold919.39	146.654	151.251	129.564	321.858	351.367	332.276	1.23403	0	88.69
CA.PGAv.1.6.scaffold80.7	137.488	107.602	131.723	326.081	268.302	289.813	1.23052	0	100	CA09g07070	DUF26 domain-containing protein 2, putative
CA.PGAv.1.6.scaffold78.9	291.27	257.838	250.49	562.617	651.234	651.814	1.22234	0	100	CA08g06530	Tyramine n-hydroxycinnamoyl transferase
CA.PGAv.1.6.scaffold784.1	96.7506	97.4504	88.5351	177.402	232.584	249.473	1.22182	0	100	CA07g11190	ACC oxidase 4-like
CA.PGAv.1.6.scaffold371.74	40.7371	44.6648	46.4269	107.286	110.477	89.1732	1.21927	0	90.31	CA04g19440	Protein Z, putative
CA.PGAv.1.6.scaffold890.20	1636.61	1698.28	1609.83	3820.05	3583.45	4098.78	1.21796	0	100	CA02g20570	Unknown protein
CA.PGAv.1.6.scaffold1859.4	46.8477	56.8461	37.7894	107.286	115.461	106.159	1.21704	0	100	CA00g85680	Tm-2 ToMV resistant protein
CA.PGAv.1.6.scaffold809.74	154.801	141.1	150.078	338.753	351.367	346.077	1.21625	0	100	CA02g19090	Global transcription factor group
CA.PGAv.1.6.scaffold647.3	114.064	99.4806	92.8539	231.467	257.503	219.748	1.2098	0	100	CA04g04510	Sugar transporter, putative
CA.PGAv.1.6.scaffold999.45	95.7322	96.4353	69.1006	205.279	204.341	193.209	1.20622	0	100	CA03g28010	Homeobox
CA.PGAv.1.6.scaffold1231.6	1090.74	1211.02	1118.57	2127.13	3014.45	2741.02	1.20454	0	100	CA00g51890	Endochitinase (Precursor)
CA.PGAv.1.6.scaffold700.22	72.3084	63.9518	52.9051	123.336	178.591	133.76	1.20365	0	100	CA01g26820	Xyloglucan endotransglucosylase/hydrolase 14
CA.PGAv.1.6.scaffold640.18	74.3452	78.1634	75.5788	168.109	169.454	186.839	1.20109	0	100	CA07g12760	Detected protein of unknown function
CA.PGAv.1.6.scaffold713.34	70.2715	65.9821	61.5427	147.835	152.841	152.868	1.19723	3e-75	82.78
CA.PGAv.1.6.scaffold183.30	198.593	206.067	209.461	430.833	511.684	462.852	1.19435	2e-180	90.74
CA.PGAv.1.6.scaffold782.16	618.186	538.008	523.653	1414.15	1152.95	1259.04	1.18756	0	100	CA10g02820	Orcinol O-methyltransferase-like protein
CA.PGAv.1.6.scaffold464.28	122.211	91.3598	115.528	228.933	284.915	235.672	1.18745	0	100	CA07g15040	CYP72A56
CA.PGAv.1.6.scaffold1836.1	347.284	348.182	334.706	874.337	747.59	718.694	1.18401	0	100	CA00g85080	Detected protein of unknown function
CA.PGAv.1.6.scaffold532.101	200.63	198.961	167.353	429.988	456.861	401.28	1.184	0	100	CA01g01300	Proline transporter (Fragment)
CA.PGAv.1.6.scaffold502.27	147.672	127.904	144.679	287.222	352.198	309.983	1.17576	0	100	CA10g14310	Peptide transporter, putative
CA.PGAv.1.6.scaffold793.14	85.5479	120.798	84.2163	229.778	219.293	207.009	1.17502	1e-159	92.99	CA03g05470	ACC oxidase 1-like
CA.PGAv.1.6.scaffold208.23	17818.4	19096.2	18364.6	39149.2	44675.2	40911.4	1.17407	0	100	CA12g18140	Catalase
CA.PGAv.1.6.scaffold404.22	76.3821	116.737	65.8615	199.366	192.712	191.085	1.17105	0	100	CA04g03880	PREDICTED: probable LRR receptor-like serine/threonine-protein kinase At3g47570-like
CA.PGAv.1.6.scaffold641.36	280.068	286.261	254.808	615.838	625.484	607.227	1.1707	0	100	CA10g20200	PREDICTED: probable calcium-binding protein CML36-like
CA.PGAv.1.6.scaffold1131.9	84.5295	84.254	77.7381	174.867	195.204	183.654	1.16746	0	85.27
CA.PGAv.1.6.scaffold1372.17	273.957	296.412	261.287	598.097	682.799	585.995	1.16658	0	100	CA08g13960	Detected protein of unknown function
CA.PGAv.1.6.scaffold77.6	68.2347	87.2993	76.6585	188.384	172.776	159.238	1.16429	0	100	CA03g13930	PREDICTED: probable galactinol--sucrose galactosyltransferase 2-like isoform X2
CA.PGAv.1.6.scaffold394.134	172.114	195.916	150.078	340.442	480.95	336.523	1.1602	0	100	CA06g25370	Cys-3-His zinc finger protein (Fragment)
CA.PGAv.1.6.scaffold1297.8	41.7555	41.6195	58.3036	94.6143	116.292	105.097	1.15732	0	100	CA10g14060	Receptor kinase-like protein
CA.PGAv.1.6.scaffold43.17	70.2715	77.1483	65.8615	152.059	132.074	187.901	1.14613	2e-174	100	CA11g08790	PREDICTED: nuclear transcription factor Y subunit C-4-like
CA.PGAv.1.6.scaffold572.17	45.8292	58.8763	46.4269	124.181	88.0495	122.082	1.14539	0	100	CA01g06510	Unknown protein
CA.PGAv.1.6.scaffold279.18	1048.98	1069.92	1014.91	2265.67	2457.08	2205.98	1.14467	0	100	CA11g05360	Serine/threonine-protein kinase PBS1, putative
CA.PGAv.1.6.scaffold321.26	126.285	138.055	115.528	288.911	279.931	268.581	1.14046	0	100	CA12g04400	Dicer-like 2 protein
CA.PGAv.1.6.scaffold181.54	83.5111	72.0727	72.3397	171.488	161.978	168.792	1.13988	0	100	CA06g03350	Protein translocase, putative
CA.PGAv.1.6.scaffold79.82	284.141	298.442	287.199	635.267	600.564	675.169	1.1356	2e-81	100	CA02g04260	PREDICTED: non-specific lipid-transfer protein 2-like
CA.PGAv.1.6.scaffold420.8	196.557	222.309	192.186	442.66	447.723	446.928	1.12997	0	100	CA11g13580	R2r3-myb transcription factor, putative
CA.PGAv.1.6.scaffold1344.21	74.3452	79.1785	86.3757	180.781	180.252	162.423	1.12564	0	80.39
CA.PGAv.1.6.scaffold1076.6	312.657	345.137	330.387	714.676	671.17	768.588	1.12446	0	100	CA08g12860	Microfibrillar-associated protein
CA.PGAv.1.6.scaffold407.1	213.87	212.158	212.7	451.952	407.852	530.793	1.12243	0	100	CA03g32700	PREDICTED: chaperone protein dnaJ 8, chloroplastic-like
CA.PGAv.1.6.scaffold533.10	81.4742	102.526	86.3757	172.333	213.479	200.64	1.11705	0	100	CA02g01560	Salicylic acid-binding protein 2
CA.PGAv.1.6.scaffold152.2	197.575	189.825	221.338	286.377	498.393	531.855	1.11295	0	100	CA03g15850	PME inhibitor
CA.PGAv.1.6.scaffold1782.2	3563.48	3877.71	3722.79	7445.81	8078.96	8615.83	1.11261	0	100	CA05g03180	Ferritin
CA.PGAv.1.6.scaffold765.35	392.095	421.27	404.886	862.511	850.591	916.149	1.10984	0	100	CA05g17350	Chaperone protein dnaJ 20, chloroplast, putative
CA.PGAv.1.6.scaffold126.31	102.861	107.602	101.491	210.348	210.156	252.657	1.10962	0	100	CA03g25710	mRNA, clone: RTFL01-28-H06
CA.PGAv.1.6.scaffold2107.5	105.916	118.768	129.564	232.312	234.245	297.244	1.10844	0	100	CA00g90600	Nicotine N-demethylase
CA.PGAv.1.6.scaffold215.13	155.819	133.994	128.484	270.327	279.931	350.323	1.10633	0	100	CA02g02650	Protein binding protein, putative
CA.PGAv.1.6.scaffold1228.28	317.749	336.001	334.706	692.712	691.106	744.172	1.10624	0	100	CA03g28870	DNAJ heat shock N-terminal domain-containing protein
CA.PGAv.1.6.scaffold594.5	43.7924	65.9821	57.2239	123.336	128.752	107.22	1.10539	7e-141	89.69
CA.PGAv.1.6.scaffold1424.8	3413.77	3078.82	3289.84	6937.25	6938.47	7157.21	1.10439	0	100	CA07g02110	Polygalacturonase inhibiting protein (Fragment)
CA.PGAv.1.6.scaffold39.5	219.98	220.279	226.736	494.191	465.998	472.406	1.10288	0	100	CA02g03320	Phytoalexin-deficient 04월 01일 protein
CA.PGAv.1.6.scaffold128.74	114.064	109.632	137.121	255.121	257.503	262.212	1.10262	0	100	CA10g18930	Cytochrome P450
CA.PGAv.1.6.scaffold529.63	228.128	224.339	218.099	397.042	535.773	502.13	1.09755	0	100	CA02g15540	PREDICTED: homeobox-leucine zipper protein ATHB-52-like
CA.PGAv.1.6.scaffold222.21	58.0504	62.9367	66.9412	118.268	162.809	121.021	1.09736	0	95.09	CA12g02650	PREDICTED: probable LRR receptor-like serine/threonine-protein kinase At4g36180-like
CA.PGAv.1.6.scaffold268.6	90.6401	99.4806	100.412	190.918	197.696	232.487	1.09613	5e-137	99.26	CA04g13430	Cak assembly factor, putative
CA.PGAv.1.6.scaffold525.9	64.1609	95.4202	79.8975	144.456	181.083	185.778	1.09432	0	100	CA05g01870	PREDICTED: nudix hydrolase 17, mitochondrial-like
CA.PGAv.1.6.scaffold222.119	65.1794	43.6497	53.9848	94.6143	110.477	141.191	1.08873	1e-157	92.71	CA09g04700	PREDICTED: auxin-induced protein 6B-like
CA.PGAv.1.6.scaffold630.30	198.593	177.644	179.23	395.353	430.28	355.631	1.08856	0	100	CA01g03950	ACC synthase 2-like
CA.PGAv.1.6.scaffold222.92	70.2715	72.0727	63.7021	157.127	142.873	138.006	1.08798	3e-101	97.65	CA12g01840	PREDICTED: auxin-induced protein 15A-like
CA.PGAv.1.6.scaffold790.11	447.09	462.89	432.958	949.522	996.787	907.656	1.08758	0	100	CA03g36540	Pumilio domain-containing protein PPD1
CA.PGAv.1.6.scaffold1549.15	104.898	100.496	98.2524	184.16	245.874	214.44	1.08573	1e-168	100	CA06g27020	DnaJ-like protein
CA.PGAv.1.6.scaffold29.7	75.3637	75.118	63.7021	140.232	166.131	147.56	1.0836	0	100	CA12g11230	PREDICTED: tetraspanin-6-like
CA.PGAv.1.6.scaffold584.21	38.7003	59.8914	44.2676	103.907	109.647	89.1732	1.08342	6e-147	92.8	CA07g00320	PREDICTED: pathogenesis-related protein PR-1-like
CA.PGAv.1.6.scaffold749.27	53.9767	58.8763	46.4269	125.871	110.477	100.851	1.08203	0	100	CA03g06400	E3 ubiquitin ligase PUB14, putative
CA.PGAv.1.6.scaffold575.81	82.4926	89.3296	87.4554	189.229	161.147	198.517	1.08203	0	100	CA12g22250	Nicotine N-demethylase
CA.PGAv.1.6.scaffold504.17	109.99	133.994	125.245	204.434	287.407	289.813	1.08201	0	100	CA01g31060	PREDICTED: basic form of pathogenesis-related protein 1-like
CA.PGAv.1.6.scaffold1946.1	60.0872	53.8008	51.8254	128.405	113.8	106.159	1.0719	0	99.68	CA00g88000	Avr9 elicitor response protein
CA.PGAv.1.6.scaffold1366.9	93.6953	60.9065	80.9772	164.73	171.946	158.176	1.07079	0	100	CA05g03030	Cytochrome P450 CYP736A54
CA.PGAv.1.6.scaffold1061.41	340.155	337.016	318.51	722.279	626.314	740.987	1.06946	0	100	CA02g24260	VTC2-like protein
CA.PGAv.1.6.scaffold493.2	77.4005	56.8461	65.8615	136.853	141.211	141.191	1.06705	0	100	CA11g10220	Octicosapeptide/Phox/Bem1p family protein isoform 1
CA.PGAv.1.6.scaffold1115.4	316.731	149.221	212.7	477.295	439.417	500.007	1.06181	0	100	CA00g45250	Unknown protein
CA.PGAv.1.6.scaffold78.145	97.7691	111.662	126.324	228.933	256.673	214.44	1.06004	0	100	CA08g07920	PREDICTED: BAG family molecular chaperone regulator 6-like
CA.PGAv.1.6.scaffold1075.19	84.5295	97.4504	92.8539	163.041	234.245	175.162	1.05858	0	100	CA02g25080	Putative peroxidase
CA.PGAv.1.6.scaffold1054.26	86.5664	79.1785	95.0133	185.005	177.76	179.408	1.05604	0	100	CA04g18070	Acyl-CoA-binding protein
CA.PGAv.1.6.scaffold1656.15	120.174	105.571	88.5351	214.572	211.817	223.995	1.04924	0	100	CA00g77630	Calcium-binding allergen Ole e, putative
CA.PGAv.1.6.scaffold65.72	122.211	121.813	160.875	321.013	208.495	305.737	1.04464	0	100	CA06g20730	Tumor-related protein
CA.PGAv.1.6.scaffold345.7	271.92	210.127	279.641	597.253	421.142	549.902	1.04192	0	100	CA10g10710	PREDICTED: non-specific lipid-transfer protein 2-like
CA.PGAv.1.6.scaffold863.1	106.935	96.4353	87.4554	166.42	230.092	201.701	1.0405	0	100	CA07g03060	PREDICTED: probable flavin-containing monooxygenase 1
CA.PGAv.1.6.scaffold352.18	91.6585	78.1634	86.3757	176.557	171.946	178.346	1.04013	0	100	CA03g24610	AMP-activated protein kinase, gamma regulatory subunit, putative
CA.PGAv.1.6.scaffold201.35	130.359	117.753	155.476	274.55	261.657	292.998	1.03885
CA.PGAv.1.6.scaffold298.19	134.432	148.206	125.245	270.327	319.802	243.103	1.03056	0	100	CA01g07220	Detected protein of unknown function
CA.PGAv.1.6.scaffold339.21	1406.45	1407.96	1534.25	2995.56	2647.3	3201.74	1.02423	5e-64	93.89
CA.PGAv.1.6.scaffold105.12	191.464	181.704	181.389	333.684	421.142	371.555	1.02229	0	100	CA10g05370	Hydrolase, hydrolyzing O-glycosyl compounds, putative
CA.PGAv.1.6.scaffold1274.3	44.8108	64.967	64.7818	107.286	107.985	139.068	1.02141	9e-137	100	CA02g21540	Detected protein of unknown function
CA.PGAv.1.6.scaffold644.33	290.252	275.094	300.156	554.169	550.725	649.691	1.01952	0	100	CA11g17700	Unknown protein
CA.PGAv.1.6.scaffold311.60	2355.62	2001.79	2054.66	3908.75	4639.21	4439.55	1.01826	0	100	CA04g22120	Alpha-expansin (Precursor)
CA.PGAv.1.6.scaffold273.27	324.878	430.406	368.177	840.546	705.227	726.125	1.01595	0	100	CA01g10050	PREDICTED: protein ASPARTIC PROTEASE IN GUARD CELL 1-like
CA.PGAv.1.6.scaffold793.13	82.4926	68.0123	102.571	156.283	193.543	161.361	1.01428	0	100	CA03g05450	E8 protein homolog
CA.PGAv.1.6.scaffold1517.1	173.133	177.644	169.512	375.923	318.141	354.57	1.01113	0	99.5	CA00g70930	Detected protein of unknown function
CA.PGAv.1.6.scaffold588.16	483.753	512.63	537.689	981.623	967.714	1139.08	1.0095	0	99.73	CA08g18750	uncharacterized LOC102580903
CA.PGAv.1.6.scaffold44.3	880.94	968.414	834.605	1636.32	1945.4	1804.7	1.00496	0	100	CA05g09460	Ferritin
CA.PGAv.1.6.scaffold749.28	139.525	154.297	171.672	313.41	263.318	356.693	1.00377	1e-50	92.68
CA.PGAv.1.6.scaffold69.11	268.865	286.261	258.047	568.53	538.265	522.3	1.00244	3e-127	100	CA01g24530	Protein C9orf114, putative
CA.PGAv.1.6.scaffold199.59	212.851	189.825	219.178	130.939	85.5575	94.4812	-0.999765	0	93.04	CA03g02080	Cyclin A, putative
CA.PGAv.1.6.scaffold948.1	134.432	116.737	147.918	97.9934	48.178	53.0793	-1.00212	0	100	CA04g11400	Cyclin A-like protein
CA.PGAv.1.6.scaffold824.43	266.828	292.351	296.917	152.903	147.026	126.329	-1.00604	0	100	CA09g01620	Protein kinase APK1A, chloroplast, putative
CA.PGAv.1.6.scaffold1528.7	413.482	385.741	395.169	223.864	170.284	198.517	-1.01099	0	100	CA00g71380	Arginosuccinate synthase family
CA.PGAv.1.6.scaffold257.129	210.815	177.644	175.991	98.8381	77.251	101.912	-1.02175	0	100	CA02g12950	PREDICTED: GDSL esterase/lipase At1g29670-like
CA.PGAv.1.6.scaffold394.99	401.261	373.56	386.531	228.088	127.09	216.564	-1.02237	0	100	CA06g25030	Proliferating cell nuclear antigen
CA.PGAv.1.6.scaffold38.7	98.7875	116.737	88.5351	56.5996	43.1941	49.8945	-1.0224	0	81.46
CA.PGAv.1.6.scaffold6.33	1914.64	1877.95	1751.27	979.089	954.423	795.128	-1.02271	0	100	CA08g03060	Erecta, putative
CA.PGAv.1.6.scaffold206.153	262.754	308.593	262.366	179.091	119.614	111.467	-1.02332	0	100	CA02g28230	Structural maintenance of chromosomes protein
CA.PGAv.1.6.scaffold837.7	231.183	208.097	207.302	110.665	90.5415	116.774	-1.02389	0	100	CA03g30160	At1g18800
CA.PGAv.1.6.scaffold724.48	1593.84	1428.26	1366.9	777.189	662.863	703.832	-1.03366	0	67.87
CA.PGAv.1.6.scaffold815.4	134.432	150.236	182.469	95.459	53.9926	78.5574	-1.03476	0	100	CA00g81530	Photosystem I P700 chlorophyll a apoprotein A1
CA.PGAv.1.6.scaffold623.23	128.322	132.979	133.882	70.9607	57.3152	63.6952	-1.04163	0	100	CA07g20500	Systemin receptor SR160, putative
CA.PGAv.1.6.scaffold668.33	113.045	114.707	104.731	61.6682	55.6539	43.525	-1.04759	0	100	CA03g07970	Cellulose synthase A catalytic subunit 3
CA.PGAv.1.6.scaffold1633.5	145.635	139.07	143.6	72.6502	73.9284	60.5104	-1.04839	0	79.98
CA.PGAv.1.6.scaffold12.22	236.275	226.369	236.454	110.665	135.397	91.2964	-1.05121	3e-171	90.85	CA05g17070	PREDICTED: putative dihydroxy-acid dehydratase, mitochondrial-like
CA.PGAv.1.6.scaffold394.16	523.472	536.992	548.486	295.67	215.14	265.397	-1.05161	0	100	CA06g24300	Flavone synthase II
CA.PGAv.1.6.scaffold1231.17	254.607	211.143	181.389	123.336	99.6787	88.1116	-1.05657	0	100	CA00g51990	Cyclin
CA.PGAv.1.6.scaffold293.20	210.815	173.584	218.099	81.098	110.477	97.6659	-1.05868	0	100	CA01g22320	Detected protein of unknown function
CA.PGAv.1.6.scaffold778.2	142.58	133.994	131.723	78.5636	50.67	64.7567	-1.07363	0	100	CA00g22820	Tuber-specific and sucrose-responsive element binding factor
CA.PGAv.1.6.scaffold1812.1	317.749	249.717	274.243	164.73	95.5254	136.945	-1.08346	0	100	CA00g84260	Cyclin D3a (Fragment)
CA.PGAv.1.6.scaffold137.24	98.7875	110.647	109.049	46.4624	59.8072	42.4634	-1.09849	0	100	CA01g30090	PREDICTED: F-box/LRR-repeat protein 25-like
CA.PGAv.1.6.scaffold781.18	155.819	127.904	167.353	90.3904	53.9926	65.8183	-1.1016	0	100	CA03g28340	Polygalacturonase-1 non-catalytic subunit beta, putative
CA.PGAv.1.6.scaffold424.35	119.156	124.858	100.412	60.8235	53.9926	44.5866	-1.11152	0	100	CA02g17010	D6-type cyclin
CA.PGAv.1.6.scaffold322.42	167.022	188.81	134.962	74.3398	86.3882	65.8183	-1.11531	0	99.94	CA08g17720	ATP binding protein, putative
CA.PGAv.1.6.scaffold1078.7	211.833	194.901	218.099	86.1666	100.509	99.7891	-1.12511	0	100	CA01g33020	GMC-type oxidoreductase, putative
CA.PGAv.1.6.scaffold641.74	144.617	124.858	114.448	61.6682	63.9605	49.8945	-1.12915	0	99.91	CA10g19800	Condensin, putative
CA.PGAv.1.6.scaffold1415.28	179.243	157.342	163.034	84.477	89.7108	54.1409	-1.12972	0	100	CA00g64720	Protein embryo defective 1703
CA.PGAv.1.6.scaffold919.35	241.367	229.415	240.772	129.25	81.4043	113.59	-1.13389	0	100	CA06g22880	Detected protein of unknown function
CA.PGAv.1.6.scaffold449.11	149.709	152.266	146.839	85.3218	47.3474	71.1263	-1.139	0	100	CA05g17820	UTP:alpha-D-glucose-1-phosphate uridylyltransferase
CA.PGAv.1.6.scaffold1134.3	139.525	137.04	124.165	66.7369	57.3152	56.2641	-1.1521	0	100	CA08g11540	PREDICTED: protein FANTASTIC FOUR 3-like
CA.PGAv.1.6.scaffold919.19	914.548	876.039	806.533	411.403	399.545	354.57	-1.15594	0	100	CA06g23060	Gland-specific fatty acyl-CoA reductase 1
CA.PGAv.1.6.scaffold1478.8	209.796	294.381	336.865	157.972	89.7108	128.452	-1.16093	0	100	CA00g68220	Photosystem II cp47 protein (Fragment)
CA.PGAv.1.6.scaffold912.2	40971.3	40067.4	41687.1	19123.9	16687.9	18939.8	-1.16447	0	100	CA02g02740	Glyceraldehyde-3-phosphate dehydrogenase
CA.PGAv.1.6.scaffold337.17	587.633	541.053	543.087	216.261	269.963	254.781	-1.17382	0	100	CA07g20290	Putative zinc transporter
CA.PGAv.1.6.scaffold497.23	558.098	543.083	551.725	240.76	232.584	254.781	-1.18275	0	100	CA02g26580	Proline oxidase/dehydrogenase 1
CA.PGAv.1.6.scaffold1239.15	191.464	175.614	141.44	92.9247	44.8554	85.9885	-1.18429	0	100	CA04g17530	UPA17
CA.PGAv.1.6.scaffold206.80	186.372	204.037	166.273	66.7369	105.493	70.0647	-1.20009	0	100	CA02g29000	Multidrug/pheromone exporter protein
CA.PGAv.1.6.scaffold195.35	333.026	361.379	366.017	229.778	66.4525	162.423	-1.20916	0	87.19
CA.PGAv.1.6.scaffold593.3	1561.25	2120.56	2476.82	1122.7	585.612	875.808	-1.25294	7e-74	100	CA04g06270	Ycf68
CA.PGAv.1.6.scaffold198.27	273.957	262.913	273.163	136.008	63.9605	135.883	-1.27016	0	97.62	CA07g11720	Protein of unknown function	NA
CA.PGAv.1.6.scaffold916.12	205.722	181.704	171.672	87.0113	73.9284	63.6952	-1.31552	0	100	CA03g17140	LRR-like protein kinase family protein	AT5G62230.1
CA.PGAv.1.6.scaffold572.61	280.068	267.989	260.207	148.68	75.5897	99.7891	-1.31857	0	100	CA01g06920	pEARLI1-like lipid transfer protein	NA
CA.PGAv.1.6.scaffold322.14	191.464	161.402	199.744	91.2352	54.8233	75.3726	-1.31941	0	100	CA08g17470	Serine carboxypeptidase-like	AT3G63470.1
CA.PGAv.1.6.scaffold771.42	254.607	242.611	239.693	98.8381	107.985	87.0501	-1.32629	0	100	CA06g28070	Subtilase family protein	AT1G04110.1
CA.PGAv.1.6.scaffold569.23	240.349	246.671	214.86	130.095	72.267	75.3726	-1.33752	0	100	CA02g18070	Cytochrome P450	AT1G11600.1
CA.PGAv.1.6.scaffold861.41	169.059	184.75	160.875	76.0293	52.3313	65.8183	-1.4063	0	100	CA03g23660	Proteinase inhibitor type-2	NA
CA.PGAv.1.6.scaffold589.2	4720.41	4583.22	4856.47	1921.85	1644.7	1771.79	-1.40737	0	100	CA06g09790	GTP binding Elongation factor Tu family protein	AT5G60390.1
CA.PGAv.1.6.scaffold1129.9	89.6216	117.753	112.288	44.7728	39.8715	35.0323	-1.41741	0	98.97	CA03g33260	ATP binding microtubule motor family protein	AT1G18370.1
CA.PGAv.1.6.scaffold1030.35	97.7691	123.843	128.484	53.2205	37.3795	36.0939	-1.4664	0	100	CA04g18330	LRR protein kinase family protein	AT5G43020.1
CA.PGAv.1.6.scaffold1559.2	237.294	198.961	163.034	63.3578	79.743	66.8799	-1.513	0	100	CA00g72960	Fatty acid desaturase 3-like	AT2G29980.1
CA.PGAv.1.6.scaffold1174.1	357.468	314.684	349.822	139.387	73.9284	139.068	-1.53614	0	100	CA10g05570	putative terpene synthase 13	AT1G61680.1
CA.PGAv.1.6.scaffold132.22	391.076	391.832	369.256	165.575	81.4043	127.39	-1.62181	0	99.8	CA10g05820	(3S,6E)-nerolidol synthase 1	AT1G61680.1
CA.PGAv.1.6.scaffold410.33	129.34	139.07	120.926	46.4624	29.9036	48.833	-1.63679	4e-106	75.66		RmlC-like cupins superfamily protein	AT3G05950.1
CA.PGAv.1.6.scaffold1217.13	134.432	165.463	129.564	48.9967	42.3634	39.2787	-1.71694	0	100	CA01g04850	Putative xyloglucan galactosyltransferase	NA
CA.PGAv.1.6.scaffold688.1	328.952	360.364	306.634	139.387	46.5167	107.22	-1.76456	0	100	CA10g14650	Glycine-rich protein 5-like	NA
CA.PGAv.1.6.scaffold702.9	188.409	142.115	138.201	47.3071	31.5649	53.0793	-1.82874	0	73.56		Alpha/beta-Hydrolases superfamily protein	AT4G18550.1
CA.PGAv.1.6.scaffold303.33	112.027	129.934	99.3321	33.7908	14.1211	36.0939	-2.02245	0	91.32	CA03g21160	O-methyltransferase family protein	AT5G54160.1
CA.PGAv.1.6.scaffold5.23	395.15	400.968	440.516	152.059	16.6131	77.4958	-2.32871	0	100	CA09g11400	Glycine-rich protein 5-like	NA
CA.PGAv.1.6.scaffold484.97	2195.73	1273.96	1844.12	302.428	230.092	308.922	-2.65881	0	100	CA12g20940	ABC transporter B family member 11	NA
