# Supplementary material for: Ethylene emitted by viral pathogen-infected pepper (Capsicum annuum L.) plants is a volatile chemical cue that attracts aphid vectors
Source: Front Plant Sci. 2022 Sep 29;13:994314. doi: 10.3389/fpls.2022.994314 (PMC9559363; doi:10.3389/fpls.2022.994314)
Supplement: Supplementary Table 4 — GO terms for DEGs in response to infection with CMV-GTN. [file Table_4.xlsx]

## Sheet: GO_Up
								Up regulation
GO Type	Level	GO ID	GO Name	p-value	corr. pvalue	Pop total	Pop hits	Total	Gene count	Genes
Biological Process	5	GO:0050832	defense response to fungus	3.71214e-10	4.27639e-07	29054	612	221	23	CA.PGAv.1.6.scaffold528.5, CA.PGAv.1.6.scaffold524.25, CA.PGAv.1.6.scaffold1306.4, CA.PGAv.1.6.scaffold1306.3, CA.PGAv.1.6.scaffold1306.2, CA.PGAv.1.6.scaffold1231.6, CA.PGAv.1.6.scaffold13678.1, CA.PGAv.1.6.scaffold345.7, CA.PGAv.1.6.scaffold837.22, CA.PGAv.1.6.scaffold890.65, CA.PGAv.1.6.scaffold62.7, CA.PGAv.1.6.scaffold1424.8, CA.PGAv.1.6.scaffold1054.26, CA.PGAv.1.6.scaffold78.145, CA.PGAv.1…
Biological Process	4	GO:0098542	defense response to other organism	3.99889e-08	2.30336e-05	29054	1897	221	38	CA.PGAv.1.6.scaffold528.5, CA.PGAv.1.6.scaffold1306.4, CA.PGAv.1.6.scaffold1306.3, CA.PGAv.1.6.scaffold1306.2, CA.PGAv.1.6.scaffold1061.41, CA.PGAv.1.6.scaffold13678.1, CA.PGAv.1.6.scaffold890.65, CA.PGAv.1.6.scaffold62.7, CA.PGAv.1.6.scaffold322.47, CA.PGAv.1.6.scaffold533.10, CA.PGAv.1.6.scaffold23.1, CA.PGAv.1.6.scaffold1424.8, CA.PGAv.1.6.scaffold78.145, CA.PGAv.1.6.scaffold1613.7, CA.PGAv.1.…
Biological Process	3	GO:0009607	response to biotic stimulus	7.8508e-08	3.01471e-05	29054	2462	221	44	CA.PGAv.1.6.scaffold528.5, CA.PGAv.1.6.scaffold1306.4, CA.PGAv.1.6.scaffold1306.3, CA.PGAv.1.6.scaffold1306.2, CA.PGAv.1.6.scaffold1061.41, CA.PGAv.1.6.scaffold160.42, CA.PGAv.1.6.scaffold13678.1, CA.PGAv.1.6.scaffold786.17, CA.PGAv.1.6.scaffold890.65, CA.PGAv.1.6.scaffold62.7, CA.PGAv.1.6.scaffold322.47, CA.PGAv.1.6.scaffold533.10, CA.PGAv.1.6.scaffold23.1, CA.PGAv.1.6.scaffold1424.8, CA.PGAv.1.…
Biological Process	4	GO:0009620	response to fungus	1.3893e-07	3.26429e-05	29054	842	221	23	CA.PGAv.1.6.scaffold528.5, CA.PGAv.1.6.scaffold524.25, CA.PGAv.1.6.scaffold1306.4, CA.PGAv.1.6.scaffold1306.3, CA.PGAv.1.6.scaffold1306.2, CA.PGAv.1.6.scaffold1231.6, CA.PGAv.1.6.scaffold13678.1, CA.PGAv.1.6.scaffold345.7, CA.PGAv.1.6.scaffold837.22, CA.PGAv.1.6.scaffold890.65, CA.PGAv.1.6.scaffold62.7, CA.PGAv.1.6.scaffold1424.8, CA.PGAv.1.6.scaffold1054.26, CA.PGAv.1.6.scaffold78.145, CA.PGAv.1…
Biological Process	3	GO:0051707	response to other organism	1.70015e-07	3.26429e-05	29054	2441	221	43	CA.PGAv.1.6.scaffold528.5, CA.PGAv.1.6.scaffold1306.4, CA.PGAv.1.6.scaffold1306.3, CA.PGAv.1.6.scaffold1306.2, CA.PGAv.1.6.scaffold1061.41, CA.PGAv.1.6.scaffold160.42, CA.PGAv.1.6.scaffold13678.1, CA.PGAv.1.6.scaffold786.17, CA.PGAv.1.6.scaffold890.65, CA.PGAv.1.6.scaffold62.7, CA.PGAv.1.6.scaffold322.47, CA.PGAv.1.6.scaffold533.10, CA.PGAv.1.6.scaffold23.1, CA.PGAv.1.6.scaffold1424.8, CA.PGAv.1.…
Biological Process	4	GO:0043207	response to external biotic stimulus	1.70015e-07	3.26429e-05	29054	2441	221	43	CA.PGAv.1.6.scaffold528.5, CA.PGAv.1.6.scaffold1306.4, CA.PGAv.1.6.scaffold1306.3, CA.PGAv.1.6.scaffold1306.2, CA.PGAv.1.6.scaffold1061.41, CA.PGAv.1.6.scaffold160.42, CA.PGAv.1.6.scaffold13678.1, CA.PGAv.1.6.scaffold786.17, CA.PGAv.1.6.scaffold890.65, CA.PGAv.1.6.scaffold62.7, CA.PGAv.1.6.scaffold322.47, CA.PGAv.1.6.scaffold533.10, CA.PGAv.1.6.scaffold23.1, CA.PGAv.1.6.scaffold1424.8, CA.PGAv.1.…
Biological Process	4	GO:0006979	response to oxidative stress	2.16604e-06	0.000356468	29054	843	221	21	CA.PGAv.1.6.scaffold765.29, CA.PGAv.1.6.scaffold1307.3, CA.PGAv.1.6.scaffold1980.2, CA.PGAv.1.6.scaffold786.17, CA.PGAv.1.6.scaffold208.25, CA.PGAv.1.6.scaffold1782.2, CA.PGAv.1.6.scaffold1268.8, CA.PGAv.1.6.scaffold208.23, CA.PGAv.1.6.scaffold78.145, CA.PGAv.1.6.scaffold44.3, CA.PGAv.1.6.scaffold1091.6, CA.PGAv.1.6.scaffold1989.9, CA.PGAv.1.6.scaffold350.38, CA.PGAv.1.6.scaffold77.6, CA.PGAv.1.6…
Biological Process	3	GO:0009605	response to external stimulus	3.75399e-06	0.000540574	29054	3321	221	49	CA.PGAv.1.6.scaffold1306.4, CA.PGAv.1.6.scaffold1306.3, CA.PGAv.1.6.scaffold1306.2, CA.PGAv.1.6.scaffold160.42, CA.PGAv.1.6.scaffold13678.1, CA.PGAv.1.6.scaffold208.25, CA.PGAv.1.6.scaffold890.65, CA.PGAv.1.6.scaffold208.23, CA.PGAv.1.6.scaffold62.7, CA.PGAv.1.6.scaffold533.10, CA.PGAv.1.6.scaffold78.145, CA.PGAv.1.6.scaffold1613.7, CA.PGAv.1.6.scaffold472.12, CA.PGAv.1.6.scaffold809.74, CA.PGAv.…
Biological Process	2	GO:0051704	multi-organism process	7.92052e-06	0.000952795	29054	3214	221	47	CA.PGAv.1.6.scaffold528.5, CA.PGAv.1.6.scaffold1306.4, CA.PGAv.1.6.scaffold1306.3, CA.PGAv.1.6.scaffold1061.41, CA.PGAv.1.6.scaffold1306.2, CA.PGAv.1.6.scaffold160.42, CA.PGAv.1.6.scaffold13678.1, CA.PGAv.1.6.scaffold786.17, CA.PGAv.1.6.scaffold1076.5, CA.PGAv.1.6.scaffold890.65, CA.PGAv.1.6.scaffold322.47, CA.PGAv.1.6.scaffold62.7, CA.PGAv.1.6.scaffold533.10, CA.PGAv.1.6.scaffold23.1, CA.PGAv.1.…
Biological Process	4	GO:0046677	response to antibiotic	8.27079e-06	0.000952795	29054	1072	221	23	CA.PGAv.1.6.scaffold992.9, CA.PGAv.1.6.scaffold504.17, CA.PGAv.1.6.scaffold765.29, CA.PGAv.1.6.scaffold786.17, CA.PGAv.1.6.scaffold208.25, CA.PGAv.1.6.scaffold420.8, CA.PGAv.1.6.scaffold291.8, CA.PGAv.1.6.scaffold241.41, CA.PGAv.1.6.scaffold208.23, CA.PGAv.1.6.scaffold322.47, CA.PGAv.1.6.scaffold1164.17, CA.PGAv.1.6.scaffold533.10, CA.PGAv.1.6.scaffold1424.8, CA.PGAv.1.6.scaffold78.145, CA.PGAv.1…
Biological Process	4	GO:0006952	defense response	1.30421e-05	0.00136586	29054	3078	221	45	CA.PGAv.1.6.scaffold528.5, CA.PGAv.1.6.scaffold1306.4, CA.PGAv.1.6.scaffold1306.3, CA.PGAv.1.6.scaffold1306.2, CA.PGAv.1.6.scaffold1061.41, CA.PGAv.1.6.scaffold13678.1, CA.PGAv.1.6.scaffold890.65, CA.PGAv.1.6.scaffold62.7, CA.PGAv.1.6.scaffold322.47, CA.PGAv.1.6.scaffold533.10, CA.PGAv.1.6.scaffold23.1, CA.PGAv.1.6.scaffold1424.8, CA.PGAv.1.6.scaffold78.145, CA.PGAv.1.6.scaffold1115.4, CA.PGAv.1.…
Biological Process	5	GO:0000302	response to reactive oxygen species	2.40254e-05	0.00230643	29054	552	221	15	CA.PGAv.1.6.scaffold765.29, CA.PGAv.1.6.scaffold786.17, CA.PGAv.1.6.scaffold208.25, CA.PGAv.1.6.scaffold1782.2, CA.PGAv.1.6.scaffold1268.8, CA.PGAv.1.6.scaffold208.23, CA.PGAv.1.6.scaffold78.145, CA.PGAv.1.6.scaffold44.3, CA.PGAv.1.6.scaffold1989.9, CA.PGAv.1.6.scaffold350.38, CA.PGAv.1.6.scaffold1280.4, CA.PGAv.1.6.scaffold65.72, CA.PGAv.1.6.scaffold472.12, CA.PGAv.1.6.scaffold1030.38, CA.PGAv.1…
Biological Process	2	GO:0050896	response to stimulus	2.85902e-05	0.00253353	29054	10435	221	109	CA.PGAv.1.6.scaffold588.80, CA.PGAv.1.6.scaffold1054.8, CA.PGAv.1.6.scaffold1306.4, CA.PGAv.1.6.scaffold1306.3, CA.PGAv.1.6.scaffold1372.17, CA.PGAv.1.6.scaffold1306.2, CA.PGAv.1.6.scaffold160.42, CA.PGAv.1.6.scaffold222.119, CA.PGAv.1.6.scaffold208.25, CA.PGAv.1.6.scaffold890.65, CA.PGAv.1.6.scaffold208.23, CA.PGAv.1.6.scaffold62.7, CA.PGAv.1.6.scaffold533.10, CA.PGAv.1.6.scaffold78.145, CA.PGAv…
Biological Process	6	GO:0050830	defense response to Gram-positive bacterium	3.52591e-05	0.00290132	29054	9	221	3	CA.PGAv.1.6.scaffold62.7, CA.PGAv.1.6.scaffold528.5, CA.PGAv.1.6.scaffold345.7
Biological Process	4	GO:1901700	response to oxygen-containing compound	0.000110205	0.00846376	29054	3361	221	45	CA.PGAv.1.6.scaffold798.9, CA.PGAv.1.6.scaffold1061.41, CA.PGAv.1.6.scaffold420.8, CA.PGAv.1.6.scaffold786.17, CA.PGAv.1.6.scaffold208.25, CA.PGAv.1.6.scaffold291.8, CA.PGAv.1.6.scaffold1782.2, CA.PGAv.1.6.scaffold674.24, CA.PGAv.1.6.scaffold1268.8, CA.PGAv.1.6.scaffold208.23, CA.PGAv.1.6.scaffold322.47, CA.PGAv.1.6.scaffold533.10, CA.PGAv.1.6.scaffold1459.22, CA.PGAv.1.6.scaffold23.1, CA.PGAv.1.…
Biological Process	3	GO:0006950	response to stress	0.000253574	0.0171326	29054	6351	221	71	CA.PGAv.1.6.scaffold1054.8, CA.PGAv.1.6.scaffold1306.4, CA.PGAv.1.6.scaffold1306.3, CA.PGAv.1.6.scaffold1306.2, CA.PGAv.1.6.scaffold13678.1, CA.PGAv.1.6.scaffold208.25, CA.PGAv.1.6.scaffold890.65, CA.PGAv.1.6.scaffold208.23, CA.PGAv.1.6.scaffold62.7, CA.PGAv.1.6.scaffold533.10, CA.PGAv.1.6.scaffold78.145, CA.PGAv.1.6.scaffold1613.7, CA.PGAv.1.6.scaffold472.12, CA.PGAv.1.6.scaffold809.74, CA.PGAv.…
Biological Process	4	GO:0009617	response to bacterium	0.000263618	0.0171326	29054	922	221	18	CA.PGAv.1.6.scaffold528.5, CA.PGAv.1.6.scaffold524.25, CA.PGAv.1.6.scaffold193.37, CA.PGAv.1.6.scaffold504.17, CA.PGAv.1.6.scaffold40.12, CA.PGAv.1.6.scaffold1980.2, CA.PGAv.1.6.scaffold1061.41, CA.PGAv.1.6.scaffold345.7, CA.PGAv.1.6.scaffold786.17, CA.PGAv.1.6.scaffold80.7, CA.PGAv.1.6.scaffold62.7, CA.PGAv.1.6.scaffold1054.26, CA.PGAv.1.6.scaffold121.3, CA.PGAv.1.6.scaffold424.66, CA.PGAv.1.6.s…
Biological Process	5	GO:0051187	cofactor catabolic process	0.000267697	0.0171326	29054	274	221	9	CA.PGAv.1.6.scaffold1091.6, CA.PGAv.1.6.scaffold350.38, CA.PGAv.1.6.scaffold140.3, CA.PGAv.1.6.scaffold208.25, CA.PGAv.1.6.scaffold999.45, CA.PGAv.1.6.scaffold1075.19, CA.PGAv.1.6.scaffold765.35, CA.PGAv.1.6.scaffold492.4, CA.PGAv.1.6.scaffold208.23
Biological Process	5	GO:1902479	positive regulation of defense response to bacterium, incompatible interaction	0.000342133	0.0192477	29054	4	221	2	CA.PGAv.1.6.scaffold121.3, CA.PGAv.1.6.scaffold423.31
Biological Process	5	GO:1902477	regulation of defense response to bacterium, incompatible interaction	0.000342133	0.0192477	29054	4	221	2	CA.PGAv.1.6.scaffold121.3, CA.PGAv.1.6.scaffold423.31
Biological Process	3	GO:0042221	response to chemical	0.000359571	0.0192477	29054	5850	221	66	CA.PGAv.1.6.scaffold588.80, CA.PGAv.1.6.scaffold1054.8, CA.PGAv.1.6.scaffold222.92, CA.PGAv.1.6.scaffold1372.17, CA.PGAv.1.6.scaffold222.119, CA.PGAv.1.6.scaffold208.25, CA.PGAv.1.6.scaffold208.23, CA.PGAv.1.6.scaffold533.10, CA.PGAv.1.6.scaffold78.145, CA.PGAv.1.6.scaffold1139.8, CA.PGAv.1.6.scaffold472.12, CA.PGAv.1.6.scaffold999.45, CA.PGAv.1.6.scaffold793.13, CA.PGAv.1.6.scaffold793.14, CA.PG…
Biological Process	4	GO:0042493	response to drug	0.000367578	0.0192477	29054	1560	221	25	CA.PGAv.1.6.scaffold786.17, CA.PGAv.1.6.scaffold208.25, CA.PGAv.1.6.scaffold420.8, CA.PGAv.1.6.scaffold291.8, CA.PGAv.1.6.scaffold208.23, CA.PGAv.1.6.scaffold322.47, CA.PGAv.1.6.scaffold23.1, CA.PGAv.1.6.scaffold533.10, CA.PGAv.1.6.scaffold1424.8, CA.PGAv.1.6.scaffold78.145, CA.PGAv.1.6.scaffold784.1, CA.PGAv.1.6.scaffold472.12, CA.PGAv.1.6.scaffold992.9, CA.PGAv.1.6.scaffold504.17, CA.PGAv.1.6.s…
Biological Process	5	GO:0006040	amino sugar metabolic process	0.000449669	0.0220986	29054	47	221	4	CA.PGAv.1.6.scaffold1306.4, CA.PGAv.1.6.scaffold1306.3, CA.PGAv.1.6.scaffold1306.2, CA.PGAv.1.6.scaffold13678.1
Biological Process	6	GO:0042744	hydrogen peroxide catabolic process	0.000460389	0.0220986	29054	179	221	7	CA.PGAv.1.6.scaffold1091.6, CA.PGAv.1.6.scaffold350.38, CA.PGAv.1.6.scaffold140.3, CA.PGAv.1.6.scaffold208.25, CA.PGAv.1.6.scaffold1075.19, CA.PGAv.1.6.scaffold492.4, CA.PGAv.1.6.scaffold208.23
Biological Process	3	GO:0006457	protein folding	0.000547682	0.0252372	29054	507	221	12	CA.PGAv.1.6.scaffold78.145, CA.PGAv.1.6.scaffold407.1, CA.PGAv.1.6.scaffold765.29, CA.PGAv.1.6.scaffold1274.3, CA.PGAv.1.6.scaffold1228.28, CA.PGAv.1.6.scaffold350.38, CA.PGAv.1.6.scaffold1932.6, CA.PGAv.1.6.scaffold786.17, CA.PGAv.1.6.scaffold65.72, CA.PGAv.1.6.scaffold1030.38, CA.PGAv.1.6.scaffold901.2, CA.PGAv.1.6.scaffold765.35
Biological Process	5	GO:0017001	antibiotic catabolic process	0.000636035	0.0281812	29054	189	221	7	CA.PGAv.1.6.scaffold1091.6, CA.PGAv.1.6.scaffold350.38, CA.PGAv.1.6.scaffold140.3, CA.PGAv.1.6.scaffold208.25, CA.PGAv.1.6.scaffold1075.19, CA.PGAv.1.6.scaffold492.4, CA.PGAv.1.6.scaffold208.23
Biological Process	4	GO:1901002	positive regulation of response to salt stress	0.00117953	0.0464108	29054	7	221	2	CA.PGAv.1.6.scaffold121.3, CA.PGAv.1.6.scaffold423.31
Biological Process	5	GO:0002215	defense response to nematode	0.00117953	0.0464108	29054	7	221	2	CA.PGAv.1.6.scaffold140.3, CA.PGAv.1.6.scaffold837.22
Biological Process	4	GO:0010035	response to inorganic substance	0.0012047	0.0464108	29054	1986	221	28	CA.PGAv.1.6.scaffold567.84, CA.PGAv.1.6.scaffold588.80, CA.PGAv.1.6.scaffold786.17, CA.PGAv.1.6.scaffold208.25, CA.PGAv.1.6.scaffold1782.2, CA.PGAv.1.6.scaffold291.8, CA.PGAv.1.6.scaffold674.24, CA.PGAv.1.6.scaffold1268.8, CA.PGAv.1.6.scaffold208.23, CA.PGAv.1.6.scaffold78.145, CA.PGAv.1.6.scaffold44.3, CA.PGAv.1.6.scaffold472.12, CA.PGAv.1.6.scaffold999.45, CA.PGAv.1.6.scaffold793.13, CA.PGAv.1.…
Biological Process	5	GO:0016998	cell wall macromolecule catabolic process	0.00123598	0.0464108	29054	28	221	3	CA.PGAv.1.6.scaffold1231.6, CA.PGAv.1.6.scaffold890.65, CA.PGAv.1.6.scaffold234.14
Biological Process	9	GO:0055076	transition metal ion homeostasis	0.0012489	0.0464108	29054	274	221	8	CA.PGAv.1.6.scaffold567.84, CA.PGAv.1.6.scaffold713.34, CA.PGAv.1.6.scaffold44.3, CA.PGAv.1.6.scaffold1782.2, CA.PGAv.1.6.scaffold674.24, CA.PGAv.1.6.scaffold1156.11, CA.PGAv.1.6.scaffold1268.8, CA.PGAv.1.6.scaffold739.12
Biological Process	5	GO:0009751	response to salicylic acid	0.00129922	0.0467718	29054	719	221	14	CA.PGAv.1.6.scaffold992.9, CA.PGAv.1.6.scaffold504.17, CA.PGAv.1.6.scaffold420.8, CA.PGAv.1.6.scaffold291.8, CA.PGAv.1.6.scaffold241.41, CA.PGAv.1.6.scaffold322.47, CA.PGAv.1.6.scaffold1164.17, CA.PGAv.1.6.scaffold533.10, CA.PGAv.1.6.scaffold1424.8, CA.PGAv.1.6.scaffold424.66, CA.PGAv.1.6.scaffold1989.9, CA.PGAv.1.6.scaffold1280.4, CA.PGAv.1.6.scaffold472.12, CA.PGAv.1.6.scaffold784.1
Cellular Component	2	GO:0005576	extracellular region	7.05064e-05	0.00980039	29054	2698	221	39	CA.PGAv.1.6.scaffold528.6, CA.PGAv.1.6.scaffold1054.8, CA.PGAv.1.6.scaffold311.88, CA.PGAv.1.6.scaffold546.23, CA.PGAv.1.6.scaffold786.17, CA.PGAv.1.6.scaffold371.71, CA.PGAv.1.6.scaffold371.74, CA.PGAv.1.6.scaffold674.24, CA.PGAv.1.6.scaffold1076.6, CA.PGAv.1.6.scaffold890.65, CA.PGAv.1.6.scaffold311.60, CA.PGAv.1.6.scaffold1435.12, CA.PGAv.1.6.scaffold1424.8, CA.PGAv.1.6.scaffold584.21, CA.PGAv…
Molecular Function	6	GO:0004568	chitinase activity	5.57325e-08	1.77787e-05	29054	46	221	7	CA.PGAv.1.6.scaffold1306.4, CA.PGAv.1.6.scaffold1306.3, CA.PGAv.1.6.scaffold1306.2, CA.PGAv.1.6.scaffold1231.6, CA.PGAv.1.6.scaffold13678.1, CA.PGAv.1.6.scaffold890.65, CA.PGAv.1.6.scaffold234.14
Molecular Function	8	GO:0016231	beta-N-acetylglucosaminidase activity	1.12006e-07	1.7865e-05	29054	7	221	4	CA.PGAv.1.6.scaffold1306.4, CA.PGAv.1.6.scaffold1306.3, CA.PGAv.1.6.scaffold1306.2, CA.PGAv.1.6.scaffold13678.1
Molecular Function	7	GO:0004563	beta-N-acetylhexosaminidase activity	1.03107e-06	7.87023e-05	29054	11	221	4	CA.PGAv.1.6.scaffold1306.4, CA.PGAv.1.6.scaffold1306.3, CA.PGAv.1.6.scaffold1306.2, CA.PGAv.1.6.scaffold13678.1
Molecular Function	4	GO:0008061	chitin binding	1.31485e-06	7.87023e-05	29054	46	221	6	CA.PGAv.1.6.scaffold1306.4, CA.PGAv.1.6.scaffold1306.3, CA.PGAv.1.6.scaffold1306.2, CA.PGAv.1.6.scaffold1231.6, CA.PGAv.1.6.scaffold13678.1, CA.PGAv.1.6.scaffold234.14
Molecular Function	5	GO:0016724	oxidoreductase activity, oxidizing metal ions, oxygen as acceptor	1.72701e-06	7.87023e-05	29054	4	221	3	CA.PGAv.1.6.scaffold44.3, CA.PGAv.1.6.scaffold1782.2, CA.PGAv.1.6.scaffold1268.8
Molecular Function	6	GO:0004322	ferroxidase activity	1.72701e-06	7.87023e-05	29054	4	221	3	CA.PGAv.1.6.scaffold44.3, CA.PGAv.1.6.scaffold1782.2, CA.PGAv.1.6.scaffold1268.8
Molecular Function	8	GO:0008199	ferric iron binding	1.72701e-06	7.87023e-05	29054	4	221	3	CA.PGAv.1.6.scaffold44.3, CA.PGAv.1.6.scaffold1782.2, CA.PGAv.1.6.scaffold1268.8
Molecular Function	6	GO:0015929	hexosaminidase activity	3.07193e-06	0.000122493	29054	14	221	4	CA.PGAv.1.6.scaffold1306.4, CA.PGAv.1.6.scaffold1306.3, CA.PGAv.1.6.scaffold1306.2, CA.PGAv.1.6.scaffold13678.1
Molecular Function	7	GO:0008843	endochitinase activity	5.51892e-06	0.000195615	29054	16	221	4	CA.PGAv.1.6.scaffold1306.4, CA.PGAv.1.6.scaffold1306.3, CA.PGAv.1.6.scaffold1306.2, CA.PGAv.1.6.scaffold13678.1
Molecular Function	5	GO:0004553	hydrolase activity, hydrolyzing O-glycosyl compounds	0.00013845	0.00441654	29054	503	221	13	CA.PGAv.1.6.scaffold1306.4, CA.PGAv.1.6.scaffold1306.3, CA.PGAv.1.6.scaffold311.88, CA.PGAv.1.6.scaffold1306.2, CA.PGAv.1.6.scaffold1231.6, CA.PGAv.1.6.scaffold13678.1, CA.PGAv.1.6.scaffold21.10, CA.PGAv.1.6.scaffold837.22, CA.PGAv.1.6.scaffold890.65, CA.PGAv.1.6.scaffold105.12, CA.PGAv.1.6.scaffold700.22, CA.PGAv.1.6.scaffold77.6, CA.PGAv.1.6.scaffold234.14
Molecular Function	4	GO:0016798	hydrolase activity, acting on glycosyl bonds	0.000189998	0.00550994	29054	591	221	14	CA.PGAv.1.6.scaffold1306.4, CA.PGAv.1.6.scaffold311.12, CA.PGAv.1.6.scaffold1306.3, CA.PGAv.1.6.scaffold311.88, CA.PGAv.1.6.scaffold1306.2, CA.PGAv.1.6.scaffold1231.6, CA.PGAv.1.6.scaffold13678.1, CA.PGAv.1.6.scaffold21.10, CA.PGAv.1.6.scaffold837.22, CA.PGAv.1.6.scaffold890.65, CA.PGAv.1.6.scaffold105.12, CA.PGAv.1.6.scaffold700.22, CA.PGAv.1.6.scaffold77.6, CA.PGAv.1.6.scaffold234.14
Molecular Function	3	GO:0004601	peroxidase activity	0.000303143	0.00805856	29054	167	221	7	CA.PGAv.1.6.scaffold1091.6, CA.PGAv.1.6.scaffold100.70, CA.PGAv.1.6.scaffold350.38, CA.PGAv.1.6.scaffold140.3, CA.PGAv.1.6.scaffold208.25, CA.PGAv.1.6.scaffold1075.19, CA.PGAv.1.6.scaffold208.23
Molecular Function	4	GO:0016684	oxidoreductase activity, acting on peroxide as acceptor	0.000375212	0.0087611	29054	173	221	7	CA.PGAv.1.6.scaffold1091.6, CA.PGAv.1.6.scaffold100.70, CA.PGAv.1.6.scaffold350.38, CA.PGAv.1.6.scaffold140.3, CA.PGAv.1.6.scaffold208.25, CA.PGAv.1.6.scaffold1075.19, CA.PGAv.1.6.scaffold208.23
Molecular Function	4	GO:0016722	oxidoreductase activity, oxidizing metal ions	0.000384499	0.0087611	29054	19	221	3	CA.PGAv.1.6.scaffold44.3, CA.PGAv.1.6.scaffold1782.2, CA.PGAv.1.6.scaffold1268.8
Molecular Function	4	GO:0019825	oxygen binding	0.00055531	0.0109238	29054	303	221	9	CA.PGAv.1.6.scaffold464.22, CA.PGAv.1.6.scaffold464.32, CA.PGAv.1.6.scaffold1054.8, CA.PGAv.1.6.scaffold1131.9, CA.PGAv.1.6.scaffold2107.5, CA.PGAv.1.6.scaffold128.74, CA.PGAv.1.6.scaffold464.28, CA.PGAv.1.6.scaffold1613.7, CA.PGAv.1.6.scaffold575.81
Molecular Function	4	GO:0004096	catalase activity	0.000567359	0.0109238	29054	5	221	2	CA.PGAv.1.6.scaffold208.25, CA.PGAv.1.6.scaffold208.23
Molecular Function	4	GO:0051087	chaperone binding	0.000600874	0.0109238	29054	22	221	3	CA.PGAv.1.6.scaffold78.145, CA.PGAv.1.6.scaffold407.1, CA.PGAv.1.6.scaffold1932.6
Molecular Function	2	GO:0016209	antioxidant activity	0.00061639	0.0109238	29054	188	221	7	CA.PGAv.1.6.scaffold1091.6, CA.PGAv.1.6.scaffold100.70, CA.PGAv.1.6.scaffold350.38, CA.PGAv.1.6.scaffold140.3, CA.PGAv.1.6.scaffold208.25, CA.PGAv.1.6.scaffold1075.19, CA.PGAv.1.6.scaffold208.23
Molecular Function	4	GO:0020037	heme binding	0.000699713	0.0117478	29054	313	221	9	CA.PGAv.1.6.scaffold1091.6, CA.PGAv.1.6.scaffold128.74, CA.PGAv.1.6.scaffold1613.7, CA.PGAv.1.6.scaffold350.38, CA.PGAv.1.6.scaffold140.3, CA.PGAv.1.6.scaffold208.25, CA.PGAv.1.6.scaffold575.81, CA.PGAv.1.6.scaffold1075.19, CA.PGAv.1.6.scaffold208.23
Molecular Function	4	GO:0004857	enzyme inhibitor activity	0.00111355	0.0177611	29054	208	221	7	CA.PGAv.1.6.scaffold1424.8, CA.PGAv.1.6.scaffold765.29, CA.PGAv.1.6.scaffold152.2, CA.PGAv.1.6.scaffold65.72, CA.PGAv.1.6.scaffold371.71, CA.PGAv.1.6.scaffold371.74, CA.PGAv.1.6.scaffold484.68
Molecular Function	4	GO:0046906	tetrapyrrole binding	0.00149379	0.0226901	29054	349	221	9	CA.PGAv.1.6.scaffold1091.6, CA.PGAv.1.6.scaffold128.74, CA.PGAv.1.6.scaffold1613.7, CA.PGAv.1.6.scaffold350.38, CA.PGAv.1.6.scaffold140.3, CA.PGAv.1.6.scaffold208.25, CA.PGAv.1.6.scaffold575.81, CA.PGAv.1.6.scaffold1075.19, CA.PGAv.1.6.scaffold208.23
Molecular Function	7	GO:0047274	galactinol-sucrose galactosyltransferase activity	0.00156483	0.0226901	29054	8	221	2	CA.PGAv.1.6.scaffold77.6, CA.PGAv.1.6.scaffold21.10
Molecular Function	7	GO:0005506	iron ion binding	0.00167251	0.0231969	29054	287	221	8	CA.PGAv.1.6.scaffold44.3, CA.PGAv.1.6.scaffold575.23, CA.PGAv.1.6.scaffold128.74, CA.PGAv.1.6.scaffold1613.7, CA.PGAv.1.6.scaffold58.34, CA.PGAv.1.6.scaffold1782.2, CA.PGAv.1.6.scaffold575.81, CA.PGAv.1.6.scaffold1268.8
Molecular Function	3	GO:0008289	lipid binding	0.00210125	0.0279292	29054	367	221	9	CA.PGAv.1.6.scaffold62.7, CA.PGAv.1.6.scaffold528.5, CA.PGAv.1.6.scaffold528.6, CA.PGAv.1.6.scaffold1054.26, CA.PGAv.1.6.scaffold121.3, CA.PGAv.1.6.scaffold423.31, CA.PGAv.1.6.scaffold82.23, CA.PGAv.1.6.scaffold1218.1, CA.PGAv.1.6.scaffold345.7
Molecular Function	5	GO:0061135	endopeptidase regulator activity	0.00343078	0.0420931	29054	81	221	4	CA.PGAv.1.6.scaffold765.29, CA.PGAv.1.6.scaffold65.72, CA.PGAv.1.6.scaffold371.71, CA.PGAv.1.6.scaffold371.74
Molecular Function	6	GO:0004866	endopeptidase inhibitor activity	0.00343078	0.0420931	29054	81	221	4	CA.PGAv.1.6.scaffold765.29, CA.PGAv.1.6.scaffold371.71, CA.PGAv.1.6.scaffold65.72, CA.PGAv.1.6.scaffold371.74

## Sheet: GO_Down
								Down regulation
GO Type	Level	GO ID	GO Name	p-value	corr. pvalue	Pop total	Pop hits	Total	Gene count	Genes
Biological Process	3	GO:0051301	cell division	9.7761e-09	8.0164e-06	29054	718	56	12	CA.PGAv.1.6.scaffold1030.35, CA.PGAv.1.6.scaffold641.74, CA.PGAv.1.6.scaffold668.33, CA.PGAv.1.6.scaffold424.35, CA.PGAv.1.6.scaffold6.33, CA.PGAv.1.6.scaffold199.59, CA.PGAv.1.6.scaffold1231.17, CA.PGAv.1.6.scaffold1129.9, CA.PGAv.1.6.scaffold206.153, CA.PGAv.1.6.scaffold948.1, CA.PGAv.1.6.scaffold322.42, CA.PGAv.1.6.scaffold1812.1
Biological Process	2	GO:0008283	cell proliferation	1.07309e-07	3.72721e-05	29054	421	56	9	CA.PGAv.1.6.scaffold394.99, CA.PGAv.1.6.scaffold668.33, CA.PGAv.1.6.scaffold837.7, CA.PGAv.1.6.scaffold1231.17, CA.PGAv.1.6.scaffold199.59, CA.PGAv.1.6.scaffold948.1, CA.PGAv.1.6.scaffold771.42, CA.PGAv.1.6.scaffold1812.1, CA.PGAv.1.6.scaffold623.23
Biological Process	4	GO:0010374	stomatal complex development	1.36361e-07	3.72721e-05	29054	309	56	8	CA.PGAv.1.6.scaffold916.12, CA.PGAv.1.6.scaffold424.35, CA.PGAv.1.6.scaffold6.33, CA.PGAv.1.6.scaffold199.59, CA.PGAv.1.6.scaffold1231.17, CA.PGAv.1.6.scaffold948.1, CA.PGAv.1.6.scaffold771.42, CA.PGAv.1.6.scaffold1812.1
Biological Process	3	GO:0022402	cell cycle process	3.68079e-07	7.54561e-05	29054	814	56	11	CA.PGAv.1.6.scaffold1030.35, CA.PGAv.1.6.scaffold641.74, CA.PGAv.1.6.scaffold668.33, CA.PGAv.1.6.scaffold424.35, CA.PGAv.1.6.scaffold199.59, CA.PGAv.1.6.scaffold206.153, CA.PGAv.1.6.scaffold1129.9, CA.PGAv.1.6.scaffold948.1, CA.PGAv.1.6.scaffold322.42, CA.PGAv.1.6.scaffold1812.1, CA.PGAv.1.6.scaffold919.19
Biological Process	4	GO:1903047	mitotic cell cycle process	5.65931e-07	9.28128e-05	29054	156	56	6	CA.PGAv.1.6.scaffold641.74, CA.PGAv.1.6.scaffold199.59, CA.PGAv.1.6.scaffold206.153, CA.PGAv.1.6.scaffold948.1, CA.PGAv.1.6.scaffold322.42, CA.PGAv.1.6.scaffold1812.1
Biological Process	3	GO:0007049	cell cycle	3.41931e-06	0.000467306	29054	1241	56	12	CA.PGAv.1.6.scaffold1231.17, CA.PGAv.1.6.scaffold206.153, CA.PGAv.1.6.scaffold919.19, CA.PGAv.1.6.scaffold1030.35, CA.PGAv.1.6.scaffold641.74, CA.PGAv.1.6.scaffold668.33, CA.PGAv.1.6.scaffold424.35, CA.PGAv.1.6.scaffold199.59, CA.PGAv.1.6.scaffold1129.9, CA.PGAv.1.6.scaffold948.1, CA.PGAv.1.6.scaffold322.42, CA.PGAv.1.6.scaffold1812.1
Biological Process	5	GO:0090558	plant epidermis development	1.23392e-05	0.00144544	29054	952	56	10	CA.PGAv.1.6.scaffold781.18, CA.PGAv.1.6.scaffold916.12, CA.PGAv.1.6.scaffold424.35, CA.PGAv.1.6.scaffold6.33, CA.PGAv.1.6.scaffold199.59, CA.PGAv.1.6.scaffold1231.17, CA.PGAv.1.6.scaffold778.2, CA.PGAv.1.6.scaffold948.1, CA.PGAv.1.6.scaffold771.42, CA.PGAv.1.6.scaffold1812.1
Biological Process	4	GO:0000278	mitotic cell cycle	1.97989e-05	0.00202939	29054	435	56	7	CA.PGAv.1.6.scaffold641.74, CA.PGAv.1.6.scaffold424.35, CA.PGAv.1.6.scaffold199.59, CA.PGAv.1.6.scaffold206.153, CA.PGAv.1.6.scaffold948.1, CA.PGAv.1.6.scaffold322.42, CA.PGAv.1.6.scaffold1812.1
Biological Process	5	GO:0010103	stomatal complex morphogenesis	3.06459e-05	0.00279218	29054	187	56	5	CA.PGAv.1.6.scaffold916.12, CA.PGAv.1.6.scaffold6.33, CA.PGAv.1.6.scaffold948.1, CA.PGAv.1.6.scaffold771.42, CA.PGAv.1.6.scaffold1812.1
Biological Process	5	GO:0000911	cytokinesis by cell plate formation	3.54114e-05	0.00290374	29054	321	56	6	CA.PGAv.1.6.scaffold1030.35, CA.PGAv.1.6.scaffold668.33, CA.PGAv.1.6.scaffold1129.9, CA.PGAv.1.6.scaffold948.1, CA.PGAv.1.6.scaffold322.42, CA.PGAv.1.6.scaffold1812.1
Biological Process	4	GO:0000910	cytokinesis	4.79588e-05	0.00357511	29054	339	56	6	CA.PGAv.1.6.scaffold1030.35, CA.PGAv.1.6.scaffold668.33, CA.PGAv.1.6.scaffold1129.9, CA.PGAv.1.6.scaffold948.1, CA.PGAv.1.6.scaffold322.42, CA.PGAv.1.6.scaffold1812.1
Biological Process	3	GO:0042127	regulation of cell proliferation	5.56892e-05	0.00380543	29054	212	56	5	CA.PGAv.1.6.scaffold668.33, CA.PGAv.1.6.scaffold1231.17, CA.PGAv.1.6.scaffold948.1, CA.PGAv.1.6.scaffold771.42, CA.PGAv.1.6.scaffold1812.1
Biological Process	5	GO:0007076	mitotic chromosome condensation	0.000130223	0.00821408	29054	9	56	2	CA.PGAv.1.6.scaffold641.74, CA.PGAv.1.6.scaffold206.153
Biological Process	4	GO:0090626	plant epidermis morphogenesis	0.000165519	0.00969466	29054	425	56	6	CA.PGAv.1.6.scaffold916.12, CA.PGAv.1.6.scaffold6.33, CA.PGAv.1.6.scaffold199.59, CA.PGAv.1.6.scaffold948.1, CA.PGAv.1.6.scaffold771.42, CA.PGAv.1.6.scaffold1812.1
Biological Process	7	GO:0006323	DNA packaging	0.000214693	0.0117366	29054	60	56	3	CA.PGAv.1.6.scaffold641.74, CA.PGAv.1.6.scaffold837.7, CA.PGAv.1.6.scaffold206.153
Biological Process	8	GO:0030261	chromosome condensation	0.000237857	0.0121902	29054	12	56	2	CA.PGAv.1.6.scaffold641.74, CA.PGAv.1.6.scaffold206.153
Biological Process	7	GO:0006261	DNA-dependent DNA replication	0.000447992	0.020627	29054	332	56	5	CA.PGAv.1.6.scaffold394.99, CA.PGAv.1.6.scaffold424.35, CA.PGAv.1.6.scaffold199.59, CA.PGAv.1.6.scaffold948.1, CA.PGAv.1.6.scaffold1812.1
Biological Process	5	GO:1904029	regulation of cyclin-dependent protein kinase activity	0.000483448	0.020627	29054	79	56	3	CA.PGAv.1.6.scaffold424.35, CA.PGAv.1.6.scaffold199.59, CA.PGAv.1.6.scaffold948.1
Biological Process	6	GO:0000079	regulation of cyclin-dependent protein serine/threonine kinase activity	0.000483448	0.020627	29054	79	56	3	CA.PGAv.1.6.scaffold424.35, CA.PGAv.1.6.scaffold199.59, CA.PGAv.1.6.scaffold948.1
Biological Process	7	GO:0010389	regulation of G2/M transition of mitotic cell cycle	0.000520183	0.020627	29054	81	56	3	CA.PGAv.1.6.scaffold199.59, CA.PGAv.1.6.scaffold948.1, CA.PGAv.1.6.scaffold1812.1
Biological Process	6	GO:1902749	regulation of cell cycle G2/M phase transition	0.000539201	0.020627	29054	82	56	3	CA.PGAv.1.6.scaffold199.59, CA.PGAv.1.6.scaffold948.1, CA.PGAv.1.6.scaffold1812.1
Biological Process	6	GO:0000086	G2/M transition of mitotic cell cycle	0.00055866	0.020627	29054	83	56	3	CA.PGAv.1.6.scaffold199.59, CA.PGAv.1.6.scaffold948.1, CA.PGAv.1.6.scaffold1812.1
Biological Process	5	GO:0044839	cell cycle G2/M phase transition	0.000578563	0.020627	29054	84	56	3	CA.PGAv.1.6.scaffold199.59, CA.PGAv.1.6.scaffold948.1, CA.PGAv.1.6.scaffold1812.1
Biological Process	6	GO:1901990	regulation of mitotic cell cycle phase transition	0.00082796	0.027995	29054	95	56	3	CA.PGAv.1.6.scaffold199.59, CA.PGAv.1.6.scaffold948.1, CA.PGAv.1.6.scaffold1812.1
Biological Process	5	GO:1901987	regulation of cell cycle phase transition	0.000853506	0.027995	29054	96	56	3	CA.PGAv.1.6.scaffold199.59, CA.PGAv.1.6.scaffold948.1, CA.PGAv.1.6.scaffold1812.1
Biological Process	5	GO:0044772	mitotic cell cycle phase transition	0.000988748	0.0304259	29054	101	56	3	CA.PGAv.1.6.scaffold199.59, CA.PGAv.1.6.scaffold948.1, CA.PGAv.1.6.scaffold1812.1
Biological Process	6	GO:0010583	response to cyclopentenone	0.00103428	0.0304259	29054	231	56	4	CA.PGAv.1.6.scaffold668.33, CA.PGAv.1.6.scaffold948.1, CA.PGAv.1.6.scaffold1812.1, CA.PGAv.1.6.scaffold497.23
Biological Process	8	GO:0071900	regulation of protein serine/threonine kinase activity	0.00104642	0.0304259	29054	103	56	3	CA.PGAv.1.6.scaffold424.35, CA.PGAv.1.6.scaffold199.59, CA.PGAv.1.6.scaffold948.1
Biological Process	4	GO:0044770	cell cycle phase transition	0.00107604	0.0304259	29054	104	56	3	CA.PGAv.1.6.scaffold199.59, CA.PGAv.1.6.scaffold948.1, CA.PGAv.1.6.scaffold1812.1
Biological Process	4	GO:0010016	shoot system morphogenesis	0.00122042	0.0330867	29054	621	56	6	CA.PGAv.1.6.scaffold916.12, CA.PGAv.1.6.scaffold668.33, CA.PGAv.1.6.scaffold6.33, CA.PGAv.1.6.scaffold948.1, CA.PGAv.1.6.scaffold771.42, CA.PGAv.1.6.scaffold1812.1
Biological Process	4	GO:0090698	post-embryonic plant morphogenesis	0.00125084	0.0330867	29054	624	56	6	CA.PGAv.1.6.scaffold916.12, CA.PGAv.1.6.scaffold837.7, CA.PGAv.1.6.scaffold6.33, CA.PGAv.1.6.scaffold948.1, CA.PGAv.1.6.scaffold771.42, CA.PGAv.1.6.scaffold1812.1
Biological Process	6	GO:0006260	DNA replication	0.00131239	0.0336299	29054	422	56	5	CA.PGAv.1.6.scaffold394.99, CA.PGAv.1.6.scaffold424.35, CA.PGAv.1.6.scaffold199.59, CA.PGAv.1.6.scaffold948.1, CA.PGAv.1.6.scaffold1812.1
Biological Process	4	GO:0051726	regulation of cell cycle	0.00195143	0.047452	29054	462	56	5	CA.PGAv.1.6.scaffold424.35, CA.PGAv.1.6.scaffold199.59, CA.PGAv.1.6.scaffold1231.17, CA.PGAv.1.6.scaffold948.1, CA.PGAv.1.6.scaffold1812.1
Biological Process	5	GO:0000070	mitotic sister chromatid segregation	0.00196752	0.047452	29054	34	56	2	CA.PGAv.1.6.scaffold641.74, CA.PGAv.1.6.scaffold206.153
Biological Process	4	GO:0009888	tissue development	0.00210133	0.0492311	29054	1799	56	10	CA.PGAv.1.6.scaffold781.18, CA.PGAv.1.6.scaffold916.12, CA.PGAv.1.6.scaffold424.35, CA.PGAv.1.6.scaffold6.33, CA.PGAv.1.6.scaffold199.59, CA.PGAv.1.6.scaffold1231.17, CA.PGAv.1.6.scaffold778.2, CA.PGAv.1.6.scaffold948.1, CA.PGAv.1.6.scaffold771.42, CA.PGAv.1.6.scaffold1812.1
Biological Process	6	GO:0071103	DNA conformation change	0.00217741	0.0495965	29054	133	56	3	CA.PGAv.1.6.scaffold641.74, CA.PGAv.1.6.scaffold837.7, CA.PGAv.1.6.scaffold206.153
Molecular Function	6	GO:0016538	cyclin-dependent protein serine/threonine kinase regulator activity	0.000297696	0.0474046	29054	67	56	3	CA.PGAv.1.6.scaffold199.59, CA.PGAv.1.6.scaffold948.1, CA.PGAv.1.6.scaffold1812.1
Molecular Function	5	GO:0019887	protein kinase regulator activity	0.000684879	0.0474046	29054	89	56	3	CA.PGAv.1.6.scaffold199.59, CA.PGAv.1.6.scaffold948.1, CA.PGAv.1.6.scaffold1812.1
Molecular Function	4	GO:0019207	kinase regulator activity	0.000707532	0.0474046	29054	90	56	3	CA.PGAv.1.6.scaffold199.59, CA.PGAv.1.6.scaffold948.1, CA.PGAv.1.6.scaffold1812.1
